# Supplementary material for: Psychosocial Influences on Pregnancy and Childbirth Behaviors in Northwestern Nigeria: A Cross-Sectional Analysis
Source: Research Square preprint supplement (doi:10.21203/rs.3.rs-124239/v1), 2020-12-10
Supplement: Supplementary file 1 [file d42f7fc67d55c7f85fb5a996.docx]

#### BSS_Questionnaire_Final_V5 (Coding Information Removed)

| Field | Question |
| --- | --- |
| |  | level1 (required) | | --- | --- | | Select State |
| |  | level2 (required) | | --- | --- | | Select the Local Government Area |
| |  | level3 (required) | | --- | --- | | Select the Ward |
| |  | cluster (required) | | --- | --- | | Select cluster ID |
| |  | cluster_con (required) | | --- | --- | | Select cluster ID AGAIN |
| |  |  | system_date | | --- | --- | --- | | Record the correct date and time. |
| |  |  | date_yesno (required) | | --- | --- | --- | | Is the date and time correct? |
| |  | manual_date (required) | | --- | --- | | Record the correct date and time.  Question relevant when: ${date_yesno} = '0' |
| |  | supervisor (required) | | --- | --- | | Select your supervisor's name |
| |  |  | your_name | | --- | --- | --- | | Interviewer’s Name |
| |  |  | name_yesno (required) | | --- | --- | --- | | Is your name on the list? |
| |  | name_typed (required) | | --- | --- | | Enter your name below  Please record your name  Question relevant when: ${name_yesno} = '0' |
| structure (required) | Enter structure number |
| hhid (required) | Kindly type here the Household ID  Type in the 8 digits unique Household ID |
| confirmhh (required) | Kindly confirm that you are at [address], this household is headed by [head] and there are [female_no] to be interviewed in this house. |
| notconfirm (required) | Kindly check that you entered the UNIQUE ID correctly  Question relevant when: ${confirmhh} =0 |
| consent_note | We are inviting you to participate in a behavioral sentinel surveillance (BSS) survey research study to evaluate the impact of integrated social and behavior change (SBC) programming for improving uptake of critical reproductive and child health health behaviors among childbearing women in this area.   The research study is conducted by Dr. Elizabeth Omoluabi and Dr. Akanni Akinyemi of the Center for Research Evaluation Resources and Development (CRERD), Nigeria. You are being asked to participate because you live in one of the three states selected for this study (Kebbi, Sokoto and Zamfara) and are within the reproductive age of 15 to 49 years old. Your household was chosen by chance. You will not incur any costs, and there are no direct benefits for you.   We are conducting this research study to provide robust evidence to inform program development, assess progress on behavioral objectives related to pregnant women and women with a child under age two, and assess SBC impact on select healthy behaviors.   For data collection, behavioral sentinel surveillance surveys (BSS) will be conducted three times: at baseline, midline and endline points.   Participation in this study is voluntary and a subsequent withdrawal will not incur a penalty. During the surveys, you will be asked to respond to a questionnaire on knowledge, attitudes, perceptions, behaviors and intentions related to contraception, childbearing and child health.   Your name will not appear on the survey questionnaires. You will be given a special identification number that will be electronically attached to the survey. To limit risks and ensure confidentiality, you will be interviewed at a private location of your choosing. Only the research team and our partner at Tulane Unversity will have access to all collected data. Measures will also be taken to ensure all electronic files containing identifiable information will be encrypted and protected.   If you have further questions about this study, or if you have a research-related problem, you may contact the principal investigator, Dr. Elizabeth Omoluabi or the co-Investigator, Dr. Akanni Akinyemi, 234-803-381-6486; CRERD; email: akakanni2@gmail.com; or akakanni@oauife.edu.ng |
| consent_yesno (required) | Do you agree to participate |
| |  | consent_agree | | --- | --- | | I have agreed to participate in the research project described. I understand that I can withdraw at any time. |
| |  | respondent_sign (required) | | --- | --- | | Respondent's signature |
| witness_sign (required) | Witness' signature  Question relevant when: ${consent_yesno} = 1 |
| |  | note_hh | | --- | --- | | INTERVIEWER: Carefully record details of all household members, starting with the head of the household. |
| |  |  | ALL > HOUSEHOLD QUESTIONNAIRE > HOUSEHOLD MEMBER (1) | | --- | --- | --- | | |
| |  |  |  | hq01 (required) | | --- | --- | --- | --- | | hq01. What is the name of the Household Head? |
| |  |  |  | hq02 (required) | | --- | --- | --- | --- | | hq02. What is the relationship of [hq01] to the head of the household? |
| |  |  |  | hq03 (required) | | --- | --- | --- | --- | | hq03. Is [hq01] male or female? |
| |  |  |  | hq04 (required) | | --- | --- | --- | --- | | hq04. Does [hq01] live here? |
| |  |  |  | hq05 (required) | | --- | --- | --- | --- | | hq05. Did [hq01] sleep here last night? |
| |  |  |  | hq06 (required) | | --- | --- | --- | --- | | hq06. How old was [hq01] on her last birthday?  Enter 0 if less than a year |
| |  |  |  | hq07 (required) | | --- | --- | --- | --- | | hq07. What is the highest level of school [hq01] has attended?  Question relevant when: ${hq06} >= 5 |
| |  |  |  | hq08 (required) | | --- | --- | --- | --- | | hq08. Has [hq01] attended school at any time during the 2019 or this school year?  Question relevant when: ( ${hq06} >= 5) and ( ${hq06} <= 24) |
| |  |  |  | hq09 (required) | | --- | --- | --- | --- | | hq09. What is [hq01] current marital status?  Question relevant when: ${hq06} >= 12 |
| |  |  | hq101 (required) | | --- | --- | --- | | hq101. What is the main source or drinking water for members of your household? |
| |  |  | hq101_oth (required) | | --- | --- | --- | | Other (specify)  Question relevant when: ${hq101} = -96 |
| |  |  | hq102 (required) | | --- | --- | --- | | hq102. Do members of your household regularly use any other drinking water source?  RECORD ALL MENTIONED  Question relevant when: ${hq101} > 0 |
| |  |  | hq102_oth (required) | | --- | --- | --- | | Other (specify)  Question relevant when: selected( ${hq102} , -96) |
| |  |  | hq103 (required) | | --- | --- | --- | | hq103. What is the main source of water used by members of your household for other purposes, such as cooking and handwashing |
| |  |  | hq103_oth (required) | | --- | --- | --- | | Other (specify)  Question relevant when: ${hq103} = -96 |
| |  |  | hq104 (required) | | --- | --- | --- | | hq104. Where is the [hq101_cal] located? |
| |  |  | hq105 (required) | | --- | --- | --- | | hq105. Who usually goes to the [hq101_cal] to collect drinking water for your household?  Question relevant when: ${hq104} >= 3 |
| |  |  | hq106 (required) | | --- | --- | --- | | q106. On a typical day, how long does it take you or [hq105_cal] to go to the [hq101_cal], get water, and come back?  RECORD ANSWER IN MINUTES  Question relevant when: ${hq101} >= 3 and ${hq101} !=12 |
| |  |  | hq107 (required) | | --- | --- | --- | | hq107. How many trips did [hq105_cal] make in the last week?  Question relevant when: ${hq101} >= 3 and ${hq101} !=12 |
| |  |  | hq108 (required) | | --- | --- | --- | | hq108. In the last month, has there been any time when your household did not have sufficient quantities of drinking water when needed? |
| |  |  | hq109 (required) | | --- | --- | --- | | hq109. What were the main reasons you were unable to access sufficient quantities of water when needed?  RECORD ALL MENTIONED  Question relevant when: ${hq108} = 1 |
| |  |  | hq109_oth (required) | | --- | --- | --- | | Other (specify)  Question relevant when: ${hq109} = -96 |
| |  |  | hq110 (required) | | --- | --- | --- | | hq110. Do you or other household members do anything to the water to make it safer to drink? |
| |  |  | hq111 (required) | | --- | --- | --- | | hq111. What do you usually do to make the water safer to drink?  PROBE: Anything else? RECORD ALL MENTIONED  Question relevant when: ${hq110} = 1 |
| |  |  | hq111_oth (required) | | --- | --- | --- | | Other (specify)  Question relevant when: selected( ${hq111} , -96) |
| |  |  | hq112 (required) | | --- | --- | --- | | hq112. Do you or other household members face any risks when going to fetch water?  PROBE TO FIND OUT TYPE OF RISKS. RECORD ALL MENTIONED  Question relevant when: ${hq101} >= 3 and ${hq101} !=12 |
| |  |  | hq112_oth (required) | | --- | --- | --- | | Other (specify)  Question relevant when: selected( ${hq112} , -96) |
| |  |  | hq113 (required) | | --- | --- | --- | | hq113. What kind of toilet facility do members of your household usually use? |
| |  |  | hq113_oth (required) | | --- | --- | --- | | Other (specify)  Question relevant when: ${hq113} = -96 |
| |  |  | hq114 (required) | | --- | --- | --- | | hq114. Where is the [hq113_cal] located?  Question relevant when: ${hq113} != 0 |
| |  |  | hq115 (required) | | --- | --- | --- | | hq115. Do you share this [hq113_cal] with others who are not members of your household?  Question relevant when: ( ${hq114} > 2) and ( ${hq113} != 0) |
| |  |  | hq116 (required) | | --- | --- | --- | | hq116. How many households in total use this toilet facility, including your own household?  Question relevant when: ( ${hq113} != 0) or ( ${hq115} = 1) |
| |  |  | hq117 (required) | | --- | --- | --- | | hq117. Has the [hq113_cal] ever been emptied?  Question relevant when: ( ${hq113} = 2) or ( ${hq113} = 3) or ( ${hq113} = 6) or ( ${hq113} = 7) or ( ${hq113} = 8) or ( ${hq113} = 9) or ( ${hq113} = 11) |
| |  |  | hq118 (required) | | --- | --- | --- | | hq118. The last time it was emptied, where were the contents emptied to?  Question relevant when: ( ${hq117} = 1) or ( ${hq117} = 2) or ( ${hq117} = 3) and ( ${hq113} != 0) |
| |  |  | q118_oth (required) | | --- | --- | --- | | Other (specify)  Question relevant when: ${hq118} = -96 |
| |  |  | hq121 (required) | | --- | --- | --- | | hq121. Do you or other household members face any risks when using the toilet? |
| |  |  | q121_oth (required) | | --- | --- | --- | | Other (specify)  Question relevant when: ${hq121} = -96 |
| |  |  | hq122 (required) | | --- | --- | --- | | hq122. Does this household own any livestock, herds, other farm animals, or poultry? |
| |  |  |  | hq123 | | --- | --- | --- | --- | | hq123. How many of the following does this household own? |
| |  |  |  | hq123a (required) | | --- | --- | --- | --- | | a) Milk cows or bulls? |
| |  |  |  | hq123b (required) | | --- | --- | --- | --- | | b) Other cattle? |
| |  |  |  | hq123c (required) | | --- | --- | --- | --- | | c) Horses, donkeys, or mules? |
| |  |  |  | hq123d (required) | | --- | --- | --- | --- | | d) Goats? |
| |  |  |  | hq123e (required) | | --- | --- | --- | --- | | e) Sheep? |
| |  |  |  | hq123f (required) | | --- | --- | --- | --- | | f) Chickens or other poultry? |
| |  |  | hq124 (required) | | --- | --- | --- | | hq124. Does any member of this household own any agricultural land? |
| |  |  | hq125 (required) | | --- | --- | --- | | hq125. How many acres of agricultural land do membersof this household own?  Acres mean "Kadada" in Hausa  Question relevant when: ${hq124} = 1 |
| |  |  | hq126 (required) | | --- | --- | --- | | hq126. Does your household own the house in which you live? |
| |  |  |  | hq127_note | | --- | --- | --- | --- | | The following questions are about items that your household may have. You will not be receiving any benefit based on your answers, so we ask you to be as honest as possible.    hq127. Does your household have .......? |
| |  |  |  | hq127a (required) | | --- | --- | --- | --- | | a) Electricity or solar panels? |
| |  |  |  | hq127b (required) | | --- | --- | --- | --- | | b) A radio? |
| |  |  |  | hq127c (required) | | --- | --- | --- | --- | | c) A casette player? |
| |  |  |  | hq127d (required) | | --- | --- | --- | --- | | d) A television? |
| |  |  |  | hq127e (required) | | --- | --- | --- | --- | | e) A non-mobile or fixed phone? |
| |  |  |  | hq127f (required) | | --- | --- | --- | --- | | f) A mobile phone? |
| |  |  |  | hq127g (required) | | --- | --- | --- | --- | | g) A computer? |
| |  |  |  | hq127h (required) | | --- | --- | --- | --- | | h) A CD or digital music player? |
| |  |  |  | hq127i (required) | | --- | --- | --- | --- | | i) A VCR/DVD player? |
| |  |  |  | hq127j (required) | | --- | --- | --- | --- | | j) A sofa? |
| |  |  |  | hq127k (required) | | --- | --- | --- | --- | | k) A bed? |
| |  |  |  | hq128 | | --- | --- | --- | --- | | The following questions are about items that members of your household may own. You will not be receiving any benefit based on your answers, so we ask you to be as honest as possible.    hq128. Does anyone in your household own ...? |
| |  |  |  | hq128a (required) | | --- | --- | --- | --- | | a) A watch? |
| |  |  |  | hq128b (required) | | --- | --- | --- | --- | | b) A mobile phone? |
| |  |  |  | hq128c (required) | | --- | --- | --- | --- | | c) A bicycle? |
| |  |  |  | hq128d (required) | | --- | --- | --- | --- | | d) A motorcycle or motor scooter? |
| |  |  |  | hq128e (required) | | --- | --- | --- | --- | | e) An animal-drawn cart? |
| |  |  |  | hq128f (required) | | --- | --- | --- | --- | | f) A car or truck? |
| |  |  | hq129 (required) | | --- | --- | --- | | hq129:: What is the MAIN material on the FLOOR? |
| |  |  | q129_oth (required) | | --- | --- | --- | | Other (specify)  Question relevant when: ${hq129} = -96 |
| |  |  | hq130 (required) | | --- | --- | --- | | hq130:: What is the MAIN material on the ROOF? |
| |  |  | q130_oth (required) | | --- | --- | --- | | Other (specify)  Question relevant when: ${hq130} = -96 |
| |  |  |  | hq131_1a (required) | | --- | --- | --- | --- | | hq131_1a:: How long does it take you to get from your household to the nearest SECONDARY SCHOOL?  CONVERT HOURS TO MINUTES<br/>Enter -98 if "Don't know" |
| |  |  |  | hq131_1b (required) | | --- | --- | --- | --- | | hq131_1b:: What is the primary transport you use to go there? |
| |  |  | hq131_1b_oth (required) | | --- | --- | --- | | Other primary transportation (specify)  Question relevant when: ${hq131_1b} = -96 |
| |  |  |  | hq131_2a (required) | | --- | --- | --- | --- | | hq131_2a:: How long does it take you to get from your household to the nearest HEALTH CENTRE?  CONVERT HOURS TO MINUTES<br/>Enter -98 if "Don't know" |
| |  |  |  | hq131_2b (required) | | --- | --- | --- | --- | | hq131_2b:: What is the primary transport you use to go there? |
| |  |  | hq131_2b_oth (required) | | --- | --- | --- | | Other primary transportation (specify)  Question relevant when: ${hq131_2b} = -96 |
| |  |  |  | hq131_3a (required) | | --- | --- | --- | --- | | hq131_3a:: How long does it take you to get from your household to the nearest GENERAL HOSPITAL?  CONVERT HOURS TO MINUTES<br/>Enter -98 if "Don't know" |
| |  |  |  | hq131_3b (required) | | --- | --- | --- | --- | | hq131_3b: What is the primary transport you use to go there? |
| |  |  | hq131_3b_oth (required) | | --- | --- | --- | | Other primary transportation (specify)  Question relevant when: ${hq131_3b} = -96 |
| |  |  |  | hq131_4a (required) | | --- | --- | --- | --- | | hq131_4a:: How long does it take you to get from your household to the nearest SAVINGS/CREDIT BANK?  CONVERT HOURS TO MINUTES<br/>Enter -98 if "Don't know" |
| |  |  |  | hq131_4b (required) | | --- | --- | --- | --- | | hq131_4b:: What is the primary transport you use to go there? |
| |  |  | hq131_4b_oth (required) | | --- | --- | --- | | Other primary transportation (specify)  Question relevant when: ${hq131_4b} = -96 |
| |  |  |  | hq131_5a (required) | | --- | --- | --- | --- | | hq131_5a:: How long does it take you to get from your household to the nearest TARRED ROAD?  CONVERT HOURS TO MINUTES<br/>Enter -98 if "Don't know" |
| |  |  |  | hq131_5b (required) | | --- | --- | --- | --- | | hq131_5b:: What is the primary transport you use to go there? |
| |  |  | hq131_5b_oth (required) | | --- | --- | --- | | Other primary transportation (specify)  Question relevant when: ${hq131_5b} = -96 |
| |  |  |  | hq131_6a (required) | | --- | --- | --- | --- | | hq131_6a:: How long does it take you to get from your household to the nearest LOCAL MARKET?  CONVERT HOURS TO MINUTES<br/>Enter -98 if "Don't know" |
| |  |  |  | hq131_6b (required) | | --- | --- | --- | --- | | hq131_6b:: What is the primary transport you use to go there? |
| |  |  | hq131_6b_oth (required) | | --- | --- | --- | | Other primary transportation (specify)  Question relevant when: ${hq131_6b} = -96 |
| |  |  |  | hq131_7a (required) | | --- | --- | --- | --- | | hq131_7a:: How long does it take you to get from your household to the nearest STATE CAPITAL?  CONVERT HOURS TO MINUTES<br/>Enter -98 if "Don't know" |
| |  |  |  | hq131_7b (required) | | --- | --- | --- | --- | | hq131_7b::What is the primary transport you use to go there? |
| |  |  | hq131_7b_oth (required) | | --- | --- | --- | | Other primary transportation (specify)  Question relevant when: ${hq131_7b} = -96 |
| |  |  | hq132 (required) | | --- | --- | --- | | hq132:: Does any member of your household have a bank account or a loan from a bank? |
| |  |  | hq133 (required) | | --- | --- | --- | | hq133:: Who in your household has a bank account or a loan from a bank?  Question relevant when: ${hq132} > 0 |
| |  |  | hq134 (required) | | --- | --- | --- | | hq134:: Does your household have any mosquito nets? |
| |  |  | hq135 (required) | | --- | --- | --- | | hq135:: How many mosquito nets does your household have?  Question relevant when: ${hq134} =1 |
| |  |  | hq136_note | | --- | --- | --- | | ASK RESPONDENT TO SHOW YOU ALL THE NETS IN THE HOUSEHOLD  Question relevant when: ${hq134} =1 |
| |  |  | ALL > HOUSEHOLD QUESTIONNAIRE > Mosquito Nets (1)  Group relevant when: ${hq134} =1 | | --- | --- | --- | | |
| |  |  |  | hq136a (required) | | --- | --- | --- | --- | | hq136a:: How many months ago did your household get this mosquito net # 1 ?  RECORD IN MONTHS |
| |  |  |  | hq136b (required) | | --- | --- | --- | --- | | hq136b:: OBSERVE OR ASK BRAND/TYPE OF MOSQUITO NET |
| |  |  |  | hq136c (required) | | --- | --- | --- | --- | | hq136c:: Did you get the net through a (LOCAL NAME OF MASS DISTRIBUTION CAMPAIGN), during an antenatal care visit, or during an immunization visit? |
| |  |  |  | hq136d (required) | | --- | --- | --- | --- | | hq136d:: Where did you get the net? |
| |  |  |  | q136d_oth (required) | | --- | --- | --- | --- | | Other (specify)  Question relevant when: ${hq136d} = -96 |
| |  |  |  | hq136e (required) | | --- | --- | --- | --- | | hq136e:: Did anyone sleep under this mosquito net last night? |
| |  |  |  | hq136f (required) | | --- | --- | --- | --- | | hq136f:: Why didn't anyone sleep inside this net?  Question relevant when: ${hq136e} = 0 |
| |  |  |  | hq136g (required) | | --- | --- | --- | --- | | hq136g:: Who slept under this net # 1  Question relevant when: ${hq136e} = 1 |
| |  |  | note1 (required) | | --- | --- | --- | | 0 has been mentioned in more than one net. Please go back to to the roster to review the problem  Question relevant when: ${sumpers1} > 1 |
| |  |  | note2 (required) | | --- | --- | --- | | 0 has been mentioned in more than one net. Please go back to to the roster to review the problem  Question relevant when: ${sumpers2} > 1 |
| |  |  | note3 (required) | | --- | --- | --- | | 0 has been mentioned in more than one net. Please go back to to the roster to review the problem  Question relevant when: ${sumpers3} > 1 |
| |  |  | note4 (required) | | --- | --- | --- | | 0 has been mentioned in more than one net. Please go back to to the roster to review the problem  Question relevant when: ${sumpers4} > 1 |
| |  |  | note5 (required) | | --- | --- | --- | | 0 has been mentioned in more than one net. Please go back to to the roster to review the problem  Question relevant when: ${sumpers5} > 1 |
| |  |  | note6 (required) | | --- | --- | --- | | 0 has been mentioned in more than one net. Please go back to to the roster to review the problem  Question relevant when: ${sumpers6} > 1 |
| |  |  | note7 (required) | | --- | --- | --- | | 0 has been mentioned in more than one net. Please go back to to the roster to review the problem  Question relevant when: ${sumpers7} > 1 |
| |  |  | note8 (required) | | --- | --- | --- | | 0 has been mentioned in more than one net. Please go back to to the roster to review the problem  Question relevant when: ${sumpers8} > 1 |
| |  |  | note9 (required) | | --- | --- | --- | | 0 has been mentioned in more than one net. Please go back to to the roster to review the problem  Question relevant when: ${sumpers9} > 1 |
| |  |  | note10 (required) | | --- | --- | --- | | 0 has been mentioned in more than one net. Please go back to to the roster to review the problem  Question relevant when: ${sumpers10} > 1 |
| |  |  | note11 (required) | | --- | --- | --- | | 0 has been mentioned in more than one net. Please go back to to the roster to review the problem  Question relevant when: ${sumpers11} > 1 |
| |  |  | note12 (required) | | --- | --- | --- | | 0 has been mentioned in more than one net. Please go back to to the roster to review the problem  Question relevant when: ${sumpers12} > 1 |
| |  |  | note13 (required) | | --- | --- | --- | | 0 has been mentioned in more than one net. Please go back to to the roster to review the problem  Question relevant when: ${sumpers13} > 1 |
| |  |  | note14 (required) | | --- | --- | --- | | 0 has been mentioned in more than one net. Please go back to to the roster to review the problem  Question relevant when: ${sumpers14} > 1 |
| |  |  | note15 (required) | | --- | --- | --- | | 0 has been mentioned in more than one net. Please go back to to the roster to review the problem  Question relevant when: ${sumpers15} > 1 |
| |  |  | note16 (required) | | --- | --- | --- | | 0 has been mentioned in more than one net. Please go back to to the roster to review the problem  Question relevant when: ${sumpers16} > 1 |
| |  |  | note17 (required) | | --- | --- | --- | | 0 has been mentioned in more than one net. Please go back to to the roster to review the problem  Question relevant when: ${sumpers17} > 1 |
| |  |  | note18 (required) | | --- | --- | --- | | 0 has been mentioned in more than one net. Please go back to to the roster to review the problem  Question relevant when: ${sumpers18} > 1 |
| |  |  | note19 (required) | | --- | --- | --- | | 0 has been mentioned in more than one net. Please go back to to the roster to review the problem  Question relevant when: ${sumpers19} > 1 |
| |  |  | note20 (required) | | --- | --- | --- | | 0 has been mentioned in more than one net. Please go back to to the roster to review the problem  Question relevant when: ${sumpers20} > 1 |
| |  | advice2 | | --- | --- | | Now you are about to start the Women Questionnaire. Please save your work before you proceed. |
| |  | confirmwoman | | --- | --- | | A total of [female_no] woman/women need to be interviewed in this household.  Please ask for [female_name] |
| |  | ALL > WOMEN SECTION REPEAT (1) | | --- | --- | | |
| |  |  | woman_avail (required) | | --- | --- | --- | | Is woman # 1 around for interview? |
| |  |  |  |  | sec1_note | | --- | --- | --- | --- | --- | | RESPONDENT'S BACKGROUND |
| |  |  |  |  | q101 (required) | | --- | --- | --- | --- | --- | | q101:: In what year and month were you born?  If available, check birth date in card.<br/> Scroll to JAN 2020 if "Don't Know" |
| |  |  |  |  | q102 (required) | | --- | --- | --- | --- | --- | | q102:: How old were you at your last birthday?  Enter -98 if "Don't know" |
| |  |  |  |  | q103 (required) | | --- | --- | --- | --- | --- | | q103:: Have you ever attended school? |
| |  |  |  |  | q104 (required) | | --- | --- | --- | --- | --- | | q104:: What is the highest level of school you have attended?  Question relevant when: ${q103} = 1 |
| |  |  |  |  | q105 (required) | | --- | --- | --- | --- | --- | | q105:: Now, I would like you to read this sentence to me.  SHOW CARD IN PREFERRED LOCAL LANGUAGE TO RESPONDENT<br/> <br/> IF RESPONDENT CANNOT READ THE WHOLE SENTENCE, PROBE: Can you read part of the sentence to me?  Question relevant when: ${q103} = 1 |
| |  |  |  |  | q106 (required) | | --- | --- | --- | --- | --- | | q106:: What is your religion? |
| |  |  |  |  | q106_oth (required) | | --- | --- | --- | --- | --- | | q106_oth:: Others (specify)  Question relevant when: ${q106} = -96 |
| |  |  |  |  | q107 (required) | | --- | --- | --- | --- | --- | | q107:: To what ethnic group do you belong?  If more than one ethnic group, record in other |
| |  |  |  |  | q107_oth (required) | | --- | --- | --- | --- | --- | | q107_oth:: Others (specify)  Question relevant when: ${q107} = -96 |
| |  |  |  |  | q108 (required) | | --- | --- | --- | --- | --- | | q108. During your last menstrual did you have access to enough water for washing and other menstrual needs? |
| |  |  |  |  | q109 (required) | | --- | --- | --- | --- | --- | | q109. During your last menstrual period were you able to wash and change in privacy with at home? |
| |  |  |  |  | sec2_note | | --- | --- | --- | --- | --- | | SECTION 2: REPRODUCTION  Now I would like to ask about all the births you have had during your life. |
| |  |  |  |  | q201 (required) | | --- | --- | --- | --- | --- | | q201:: Have you ever given birth? |
| |  |  |  |  | q202 (required) | | --- | --- | --- | --- | --- | | q202:: Do you have any sons or daughters to whom you have given birth WHO ARE NOW LIVING WITH YOU?  Question relevant when: ${q201} = 1 |
| |  |  |  |  |  | q203a (required) | | --- | --- | --- | --- | --- | --- | | q203a:: How many SONS live with you?  IF NONE, RECORD "00" |
| |  |  |  |  |  | q203b (required) | | --- | --- | --- | --- | --- | --- | | q203b:: And how many DAUGHTERS live with you?  IF NONE, RECORD "00" |
| |  |  |  |  | q204 (required) | | --- | --- | --- | --- | --- | | q204:: Do you have any sons or daughters to whom you have given birth who are alive BUT DO NOT LIVE WITH YOU?  Question relevant when: ${q201} = 1 |
| |  |  |  |  |  | q205a (required) | | --- | --- | --- | --- | --- | --- | | q205a:: How many SONS are alive but DO NOT live with you?  IF NONE, RECORD "00" |
| |  |  |  |  |  | q205b (required) | | --- | --- | --- | --- | --- | --- | | q205b:: And how many DAUGHTERS are alive but DO NOT live with you?  IF NONE, RECORD "00" |
| |  |  |  |  | q206 (required) | | --- | --- | --- | --- | --- | | q206:: Have you ever given birth to a boy or a girl who was born alive but later died?  IF NO, PROBE: Any baby who cried, who made any movement, sound, or effort to breathe, or who showed any other signs of life even if for a very short time.  Question relevant when: ${q201} = 1 |
| |  |  |  |  |  | q207a (required) | | --- | --- | --- | --- | --- | --- | | q207a:: How many BOYS have died? |
| |  |  |  |  |  | q207b (required) | | --- | --- | --- | --- | --- | --- | | q207b:: How many GIRLS have died? |
| |  |  |  |  | q209 (required) | | --- | --- | --- | --- | --- | | q209:: CHECK 208: Just to make sure that I have this right: you have had in **TOTAL 0 children** during your life.   Is that correct?  Question relevant when: ${q201} = 1 |
| |  |  |  |  | q209_note (required) | | --- | --- | --- | --- | --- | | PROBE AND CORRECT 201-208 AS NECESSARY  Question relevant when: ${q209} = 0 |
| |  |  |  |  | twin | | --- | --- | --- | --- | --- | | Was any of your last two births a twin |
| |  |  |  |  | sec2a_note | | --- | --- | --- | --- | --- | | Now I would like to record the names of your LAST TWO births, whether still alive or not, starting with the LAST one you had.  INTERVIEWER: RECORD NAMES OF THE LAST TWO BIRHTS IN 212. RECORD TWINS AND TRIPLETS ON SEPARATE ROWS.  Question relevant when: ${q201} = 1 |
| |  |  |  |  | ALL > WOMEN SECTION REPEAT (1) > WOMEN QUESTIONNAIRE > SECTION 2 > CHILD ROSTER (1)  Group relevant when: ${q201} = 1 | | --- | --- | --- | --- | --- | | |
| |  |  |  |  |  | notebirth | | --- | --- | --- | --- | --- | --- | | BIRTH HISTORY NUMBER YOUNGEST CHILD |
| |  |  |  |  |  | q211 (required) | | --- | --- | --- | --- | --- | --- | | q211:: What is the name of your YOUNGEST CHILD? |
| |  |  |  |  |  | q212 (required) | | --- | --- | --- | --- | --- | --- | | q212:: Is [q211] a boy or a girl? |
| |  |  |  |  |  | q213 (required) | | --- | --- | --- | --- | --- | --- | | q213:: Was this birth twins? |
| |  |  |  |  |  | q214 (required) | | --- | --- | --- | --- | --- | --- | | q214:: On what month was [q211] born?  PROBE: What is his/her birthday?<br/>Scroll to JAN 1960 if "Don't Know" |
| |  |  |  |  |  |  | q215 (required) | | --- | --- | --- | --- | --- | --- | --- | | q215:: How old was [q211] at her last birthday  RECORD AGE IN COMPLETED YEARS.<br/>IF LESS THAN 1 YEAR, RECORD NUMBER OF MONTHS AND SELECT "MONTHS" BELOW |
| |  |  |  |  |  |  | q215_i (required) | | --- | --- | --- | --- | --- | --- | --- | | - |
| |  |  |  |  |  | q216 (required) | | --- | --- | --- | --- | --- | --- | | q216:: Is [q211] still alive? |
| |  |  |  |  |  | q217 (required) | | --- | --- | --- | --- | --- | --- | | q217:: Is [q211] living with you?  Question relevant when: ${q216} = 1 |
| |  |  |  |  |  |  | q218 (required) | | --- | --- | --- | --- | --- | --- | --- | | q218:: How old was [q211] when she died?  IF “12 MONTHS” OR “1 YR”, ASK: Did [q211] have her first birthday?<br/>THEN ASK: Exactly how many months old was [q211] when she died? |
| |  |  |  |  |  |  | q218b (required) | | --- | --- | --- | --- | --- | --- | --- | | - |
| |  |  |  |  | q219 (required) | | --- | --- | --- | --- | --- | | q219:: Were there any other live births before [ros_cal1]?  including any children who died after birth?  Question relevant when: ${q201} = 1 |
| |  |  |  |  | q220 (required) | | --- | --- | --- | --- | --- | | q220:: Have you had any live births since the birth of [ros_cal1]?  Question relevant when: ${q201} = 1 |
| |  |  |  |  | q221 (required) | | --- | --- | --- | --- | --- | | q221:: Are you pregnant now? |
| |  |  |  | confirm_note (required) | | --- | --- | --- | --- | | You said you have NEVER given birth and you are currently NOT pregnant   Please confirm if this is true.  Question relevant when: ${q201} = 0 and ( ${q221} = 0 or ${q221} = -98) |
| |  |  |  | confirm_last (required) | | --- | --- | --- | --- | | You said [ros_cal1] is your last birth, whose date of birth is [age_cal1]?  Question relevant when: ${q201} = 1 |
| |  |  |  |  | sec3_note | | --- | --- | --- | --- | --- | | CONTRACEPTION  Check for the presence of others before continuing. Make every effort to ensure privacy.    Now I would like to talk about contraception - the various ways or methods that a couple can use to delay or avoid a pregnancy and control the time between pregnancies.  That is, what ways or methods can a couple use to delay or avoid a pregnancy and control the time between pregnancies? |
| |  |  |  |  |  | q301 | | --- | --- | --- | --- | --- | --- | | q301:: Which ways or methods have you ever heard of?  Which ways or methods can a couple use to delay or avoid a pregnancy and control the time between pregnancies have you heard of? |
| |  |  |  |  |  | q301a (required) | | --- | --- | --- | --- | --- | --- | | a:: FEMALE STERILIZATION/ TUBAL LIGATION  Women can have an operation to avoid having any more children. |
| |  |  |  |  |  | q301b (required) | | --- | --- | --- | --- | --- | --- | | b:: MALE STERILIZATION/VASECTOMY  Men can have an operation to avoid having any more children. |
| |  |  |  |  |  | q301c (required) | | --- | --- | --- | --- | --- | --- | | c:: IUD  Women can have a loop or coil placed inside them by a health provider. |
| |  |  |  |  |  | q301d (required) | | --- | --- | --- | --- | --- | --- | | d:: INJECTABLES OR INJECTIONS  Women can have an injection by a health provider that stops them from becoming pregnant for one or more months. |
| |  |  |  |  |  | q301e (required) | | --- | --- | --- | --- | --- | --- | | e:: IMPLANTS/IMPLANON/JADELLE  Women can have a small rod placed in their upper arm by a health provider, which can prevent pregnancy for one to three years. |
| |  |  |  |  |  | q301f (required) | | --- | --- | --- | --- | --- | --- | | f: DAILY PILL  Women can take a pill everyday to avoid becoming pregnant |
| |  |  |  |  |  | q301g (required) | | --- | --- | --- | --- | --- | --- | | f:: MALE CONDOM  Men can put a rubber sheath on their penis before sexual intercourse. |
| |  |  |  |  |  | q301h (required) | | --- | --- | --- | --- | --- | --- | | g:: FEMALE CONDOM  Women can place a sheath in their vagina before sexual intercourse. |
| |  |  |  |  |  | q301i (required) | | --- | --- | --- | --- | --- | --- | | i:: EMERGENCY CONTRACEPTION/MORNING AFTER PILL/ POSTINOR 2  Women can take pills up to 3 days after sexual intercourse to avoid becoming pregnant. |
| |  |  |  |  |  | q301j (required) | | --- | --- | --- | --- | --- | --- | | i:: STANDARD DAYS/CYCLE BEADS  Every month that a woman is sexually active she can avoid pregnancy by not having sexual intercourse on the days of the month she is most likely to get pregnant. She keeps track of this using a color- coded string of beads that indicates fertile and non-fertile days of a menstrual period. |
| |  |  |  |  |  | q301k (required) | | --- | --- | --- | --- | --- | --- | | j:: LACTATIONAL AMENORRHEA (LAM)  Up to six (6) months after childbirth, a woman can use a method that requires that she feeds the baby with only breastmilk (no other formula, water or other food) and that her menstrual period has not returned. |
| |  |  |  |  |  | q301l (required) | | --- | --- | --- | --- | --- | --- | | k:: RHYTHM METHOD  Every month that a woman is sexually active she can avoid pregnancy by not having sexual intercourse on the days of the month she is most likely to get pregnant. |
| |  |  |  |  |  | q301m (required) | | --- | --- | --- | --- | --- | --- | | l:: WITHDRAWAL  Men can be careful and pull out before climax. |
| |  |  |  |  |  | q301n (required) | | --- | --- | --- | --- | --- | --- | | n:: SPERMICIDE  Women can place a suppository, jelly, or cream in their vagina before intercourse. |
| |  |  |  |  |  | q301o (required) | | --- | --- | --- | --- | --- | --- | | o: DIAPHRAGM  Women can place a thin flexible disk in their vagina before intercourse. |
| |  |  |  |  |  | q301p (required) | | --- | --- | --- | --- | --- | --- | | p:: SAYANA PRESS  Women can receive injection with small needle |
| |  |  |  |  | q301q (required) | | --- | --- | --- | --- | --- | | q301q:: Have you heard of any other ways or methods that women or men can use to avoid pregnancy?  If respondent mentions abstinence as a method of family planning, DO NOT record as a method.<br/> Probe for any other method known. |
| |  |  |  |  | q301qa_oth (required) | | --- | --- | --- | --- | --- | | q301oa_oth:: Yes, Modern method (specify)  Question relevant when: selected( ${q301q} , 1) |
| |  |  |  |  | q301ob_oth (required) | | --- | --- | --- | --- | --- | | q301ob_oth:: Yes, Traditional method (specify)  Question relevant when: selected( ${q301q} , 2) |
| |  |  |  |  | note302 | | --- | --- | --- | --- | --- | | The respondent says DON'T KNOW |
| |  |  |  |  | q303 (required) | | --- | --- | --- | --- | --- | | q303:: Are you or your partner currently doing something or using any method of contraception?  Mark yes if respondent or respondent's partner has been sterilized  Question relevant when: ${q221} = 0 |
| |  |  |  |  | q304 (required) | | --- | --- | --- | --- | --- | | q304:: Which method are you using?  RECORD ALL MENTIONED<br/>IF MORE THAN ONE METHOD MENTIONED, FOLLOW SKIP INSTRUCTION FOR HIGHEST METHOD IN LIST.<br/> <br/>If respondent says "pill," probe further to establish if they mean the "daily pill" or the "emergency pill" <br/> <br/>PROBE ONCE: Any others?  Question relevant when: ${q303} = 1 |
| |  |  |  |  | q304_oth (required) | | --- | --- | --- | --- | --- | | q304_oth:: Other (specify)  Question relevant when: selected( ${q304} , -96) |
| |  |  |  |  | q305 (required) | | --- | --- | --- | --- | --- | | q305:: Where did you obtain (CURRENT METHOD) the last time?  PROBE TO IDENTIFY TYPE OF SOURCE<br/> IF UNABLE TO DETERMINE IF PUBLIC OR PIRVATE SECTOR, WRITE THE NAME OF THE PLACE.  Question relevant when: ${q303} = 1 |
| |  |  |  |  | q305a_oth (required) | | --- | --- | --- | --- | --- | | q305a_oth:: Other (specify)  Question relevant when: ${q305} = -96 |
| |  |  |  |  | q305b_oth (required) | | --- | --- | --- | --- | --- | | q305b_oth:: Other private sector (specify)  Question relevant when: ${q305} = -95 |
| |  |  |  |  | q305c_oth (required) | | --- | --- | --- | --- | --- | | q305c_oth:: Others public sector (specify)  Question relevant when: ${q305} = -94 |
| |  |  |  |  | q306 (required) | | --- | --- | --- | --- | --- | | q306:: Have you or your partner had any difficulties in obtaining [CURRENT METHOD]?  Question relevant when: ${q303} = 1 |
| |  |  |  |  | q307 (required) | | --- | --- | --- | --- | --- | | q307:: What are some of the difficulties you have faced in obtaining this [CURRENT METHOD]?  RECORD ALL MENTIONED <br/><br/>PROBE: Any other reasons?  Question relevant when: ${q303} = 1 and ${q306} = 1 |
| |  |  |  |  | q307_oth (required) | | --- | --- | --- | --- | --- | | q307_oth:: Other (specify)  Question relevant when: selected( ${q307} , -96) |
| |  |  |  |  |  | q308_note | | --- | --- | --- | --- | --- | --- | | The last time that you obtained a method of contraception, did the provider… |
| |  |  |  |  |  | q308_lab | | --- | --- | --- | --- | --- | --- | | - |
| |  |  |  |  |  | q308a (required) | | --- | --- | --- | --- | --- | --- | | q308a:: Ask about preferred method |
| |  |  |  |  |  | q308b (required) | | --- | --- | --- | --- | --- | --- | | q308b:: Tell how to use method(s) |
| |  |  |  |  |  | q308c (required) | | --- | --- | --- | --- | --- | --- | | q308c:: Discuss side effects of the method with you |
| |  |  |  |  |  | q308d (required) | | --- | --- | --- | --- | --- | --- | | q308d:: Discuss warning/danger signs |
| |  |  |  |  |  | q308e (required) | | --- | --- | --- | --- | --- | --- | | q308e:: Treat you respectfully |
| |  |  |  |  |  | q308f (required) | | --- | --- | --- | --- | --- | --- | | q308f:: Answer your questions or health concerns |
| |  |  |  |  | q309 (required) | | --- | --- | --- | --- | --- | | q309:: Can you tell me why you ARE USING a method of contraception?  PROBE: Any other reasons?<br/> RECORD ALL MENTIONED  Question relevant when: ${q303} = 1 |
| |  |  |  |  | q309_oth (required) | | --- | --- | --- | --- | --- | | q309_oth:: Other (specify)  Question relevant when: selected( ${q309} , -96) |
| |  |  |  |  | q310 (required) | | --- | --- | --- | --- | --- | | q310:: Can you tell me why you ARE NOT USING a method of contraception?  PROBE: Any other reasons?<br/> RECORD ALL MENTIONED  Question relevant when: ${q303} = 0 |
| |  |  |  |  | q310_oth (required) | | --- | --- | --- | --- | --- | | q310_oth:: Other (specify)  Question relevant when: selected( ${q310} , -96) |
| |  |  |  |  | sec3a_note | | --- | --- | --- | --- | --- | | IDEATIONAL FACTORS: BEHAVIORAL INTENTIONS  Question relevant when: ( ${q303} = 0) or ( ${q303} = 1) |
| |  |  |  |  | q311 (required) | | --- | --- | --- | --- | --- | | q311:: In the next 6 months, do you plan to start using a method of contraception?  Question relevant when: ${q303} = 0 |
| |  |  |  |  | q312 (required) | | --- | --- | --- | --- | --- | | q312:: In the next 6 months, do you plan to continue using a method of contraception?  Question relevant when: ${q303} = 1 |
| |  |  |  |  | q313 (required) | | --- | --- | --- | --- | --- | | q313:: Which method do you intend to use?  RECORD ALL MENTIONED?  Question relevant when: ${q312} = 1 |
| |  |  |  |  | q313_oth (required) | | --- | --- | --- | --- | --- | | q313_oth:: Other (specify)  Question relevant when: selected( ${q313} , -96) |
| |  |  |  |  | sec3b_note | | --- | --- | --- | --- | --- | | IDEATIONAL FACTORS: INTERPERSONAL COMMUNICATION AND SOCIAL SUPPORT |
| |  |  |  |  | q314 (required) | | --- | --- | --- | --- | --- | | q314:: Have you ever talked to your husband/partner about the number of children to have? |
| |  |  |  |  | q315 (required) | | --- | --- | --- | --- | --- | | q315:: Have you ever talked with your husband/partner about whether or not to use a method of modern contraception? |
| |  |  |  |  | q316 (required) | | --- | --- | --- | --- | --- | | q316:: What did you and your husband/partner talk about during that discussion?  RECORD ALL MENTIONED  Question relevant when: ${q315} = 1 |
| |  |  |  |  | q316_oth (required) | | --- | --- | --- | --- | --- | | q316_oth:: Other (specify)  Question relevant when: selected( ${q316} , -96) |
| |  |  |  |  | q317 (required) | | --- | --- | --- | --- | --- | | q317:: Who decides if you use a contraceptive method? Is it mainly your decision, mainly your partner’s decision or do you both decide together? |
| |  |  |  |  | q318 (required) | | --- | --- | --- | --- | --- | | q318:: Besides yourself and/or your husband/partner, who else influences the decision whether you use a method of modern contraception or not?  RECORD ALL MENTIONED |
| |  |  |  |  | q318_oth (required) | | --- | --- | --- | --- | --- | | q318_oth:: Other (specify)  Question relevant when: selected( ${q318} , -96) |
| |  |  |  |  | sec3c_note | | --- | --- | --- | --- | --- | | IDEATIONAL FACTORS (USING CONTRACEPTION FOR BIRTH SPACING) |
| |  |  |  |  | q319 (required) | | --- | --- | --- | --- | --- | | q319:: In your opinion, what is the ideal gap between two children? How many years?  PLEASE RECORD IN YEARS;<br/>Enter -98 for "Don't Know" |
| |  |  |  |  | q320 (required) | | --- | --- | --- | --- | --- | | q320:: In your opinion, if a mother uses contraception for birth spacing, what are the benefits for her children?  RECORD ALL MENTIONED<br/> PROBE: Any other benefits? |
| |  |  |  |  | q320_oth (required) | | --- | --- | --- | --- | --- | | q320_oth:: Other (specify)  Question relevant when: selected( ${q320} , -96) |
| |  |  |  |  | q321 (required) | | --- | --- | --- | --- | --- | | q321:: What are the benefits for herself?  RECORD ALL MENTIONED<br/> PROBE: Any other benefits? |
| |  |  |  |  | q321_oth (required) | | --- | --- | --- | --- | --- | | q321_oth:: Other (specify)  Question relevant when: selected( ${q321} , -96) |
| |  |  |  |  | q322 (required) | | --- | --- | --- | --- | --- | | q322:: Do you personally approve of using contraception for the purpose of SPACING BIRTHS? |
| |  |  |  |  | q323 (required) | | --- | --- | --- | --- | --- | | q323:: Do you think there are some people within this community who would call you bad names or avoid your company if they knew that you were using a modern method of contraception for birth spacing? |
| |  |  |  |  | note_series1 | | --- | --- | --- | --- | --- | | Now I am going to read a series of statements to you about using modern methods of contraception for birth spacing.   I would like you to tell me if you strongly agree, somewhat agree, somewhat disagree, or strongly disagree with the statement.  Interviewer: Do not read ‘DONT KNOW’ response and only use if respondent is not able to provide another answer. |
| |  |  |  |  | q324 (required) | | --- | --- | --- | --- | --- | | q324:: Couples who use a modern method of contraception for birth spacing have a better quality of life than those who do not. |
| |  |  |  |  | q325 (required) | | --- | --- | --- | --- | --- | | q325:: Side effects from using contraception are normal (safe) and usually go away in a few months. |
| |  |  |  |  | q326 (required) | | --- | --- | --- | --- | --- | | q326:: Religious leaders should speak publicly about modern methods of contraception for birth spacing. |
| |  |  |  |  | sec3d_note | | --- | --- | --- | --- | --- | | IDEATIONAL FACTORS (USING CONTRACEPTION FOR BIRTH SPACING): NORMS |
| |  |  |  |  | q327 (required) | | --- | --- | --- | --- | --- | | q327:: Most couples in my community use modern methods of contraception for birth spacing. |
| |  |  |  |  | q328 (required) | | --- | --- | --- | --- | --- | | q328:: How confident are you that you could convince your husband/partner that you should use a modern method of contraception for birth spacing. |
| |  |  |  |  | q329 (required) | | --- | --- | --- | --- | --- | | q329:: How confident are you that you could use a modern method of contraception for birth spacing even if your partner didn't want to. |
| |  |  |  |  | sec3f_note | | --- | --- | --- | --- | --- | | IDEATIONAL FACTORS: Beliefs and Attitudes |
| |  |  |  |  | note_series3 | | --- | --- | --- | --- | --- | | Now I am going to read a series of statements to you about contraception in general.  Please continue to tell me if you strongly agree, somewhat agree, somewhat disagree, or strongly disagree with the statement.  Interviewer: Do not read ‘DONT KNOW/UNCERTAIN’ response and only use if respondent is not able to provide another answer. |
| |  |  |  |  | q330 (required) | | --- | --- | --- | --- | --- | | q330:: Use of some contraceptives can make a woman permanently infertile. |
| |  |  |  |  | q331 (required) | | --- | --- | --- | --- | --- | | q331:: Contraceptives can harm a woman's womb. |
| |  |  |  |  | q332 (required) | | --- | --- | --- | --- | --- | | q332:: Contraceptives can reduce a man’s sexual urge. |
| |  |  |  |  | q333 (required) | | --- | --- | --- | --- | --- | | q333:: Contraceptives reduce a woman's sexual urge. |
| |  |  |  |  | q334 (required) | | --- | --- | --- | --- | --- | | q334:: Contraceptives can cause cancer. |
| |  |  |  |  | q335 (required) | | --- | --- | --- | --- | --- | | q335:: Contraceptives can give you deformed babies. |
| |  |  |  |  | q336 (required) | | --- | --- | --- | --- | --- | | q336:: Women who use contraception end up with health problems. |
| |  |  |  |  | q337 (required) | | --- | --- | --- | --- | --- | | q337:: Women who use contraceptives may become promiscuous. |
| |  |  |  |  | q338 (required) | | --- | --- | --- | --- | --- | | q338:: A woman's body is not ready for childbirth until she is 18. |
| |  |  |  |  | q339 (required) | | --- | --- | --- | --- | --- | | q339:: Women over 35 have a higher risk of complications during pregnancy and should consider limiting births. |
| |  |  |  |  | q340 (required) | | --- | --- | --- | --- | --- | | q340:: It is important that husbands and wives discuss contraception. |
| |  |  |  |  | sec4_note | | --- | --- | --- | --- | --- | | PREGNANCY AND ANTENATAL CARE (ANC)  This section relevant only to women who are currently pregnant (whether they have a child under 2 years or not)   Now I would like to ask you about your current pregnancy. |
| |  |  |  |  | q401 (required) | | --- | --- | --- | --- | --- | | q401:: How many months pregnant are you?  Record -98 for "Don't Know" |
| |  |  |  |  | q402 (required) | | --- | --- | --- | --- | --- | | q402:: When you got pregnant, did you want to get pregnant at that time? |
| |  |  |  |  | q403a (required) | | --- | --- | --- | --- | --- | | q403a:: Did you want to have a baby later on or did you not want any more children?  Question relevant when: ${q201} = 1 and ${q402} = 0 |
| |  |  |  |  | q403b (required) | | --- | --- | --- | --- | --- | | q403b:: Did you want to have a baby later or did you not want any children?  Question relevant when: ${q201} = 0 and ${q402} = 0 |
| |  |  |  |  | q404 (required) | | --- | --- | --- | --- | --- | | q404:: How much longer did you want to wait?  Please record in YEARS<br/>Enter -98 for "Don't Know"  Question relevant when: ( ${q402} = 0 and ${q403a} = 1) or ( ${q402} = 0 and ${q403b} = 1) |
| |  |  |  |  | q405 (required) | | --- | --- | --- | --- | --- | | q405:: Do you plan to have another child in the future? |
| |  |  |  |  | q406 (required) | | --- | --- | --- | --- | --- | | q406:: At anytime during this pregnancy, have you seen anyone for antenatal care? |
| |  |  |  |  | q407 (required) | | --- | --- | --- | --- | --- | | q407:: When did you first receive antenatal care for this pregnancy; that is, how many months pregnant were you?  Please record in MONTHS<br/> Enter -98 for "Don't Know"  Question relevant when: ${q406} =1 |
| |  |  |  |  | q408 (required) | | --- | --- | --- | --- | --- | | q408:: Where did you receive antenatal care for this first visit during the pregnancy?  IF UNABLE TO DETERMINE IF PUBLIC OR PIRVATE SECTOR, WRITE THE NAME OF THE PLACE.  Question relevant when: ${q406} =1 |
| |  |  |  |  | q408a_oth (required) | | --- | --- | --- | --- | --- | | q408a_oth:: Other (specify)  Question relevant when: selected( ${q408} , -96) |
| |  |  |  |  | q408b_oth (required) | | --- | --- | --- | --- | --- | | q408b_oth:: Other private sector (specify)  Question relevant when: selected( ${q408} , -95) |
| |  |  |  |  | q408c_oth (required) | | --- | --- | --- | --- | --- | | q408c_oth:: Others public sector (specify)  Question relevant when: selected( ${q408} , -94) |
| |  |  |  |  | q409a | | --- | --- | --- | --- | --- | | q409a:: Whom did you see when you first received antenatal care during this pregnancy?  Question relevant when: ${q406} =1 |
| |  |  |  |  | q409a_oth (required) | | --- | --- | --- | --- | --- | | q409a_oth:: Other (specify)  Question relevant when: selected( ${q409a} , -96) |
| |  |  |  |  | q409b (required) | | --- | --- | --- | --- | --- | | q411b:: How many check-ups have you had for this pregnancy? That is, how many times have you received antenatal care?  NUMBER OF ANC VISITS  Question relevant when: ${q406} =1 |
| |  |  |  |  |  | q410_note | | --- | --- | --- | --- | --- | --- | | q410:: During any of your antenatal care visits for this pregnancy, have any of the following been done at least once:  DK means "Don't know" |
| |  |  |  |  |  | q410_label | | --- | --- | --- | --- | --- | --- | | - |
| |  |  |  |  |  | q410a (required) | | --- | --- | --- | --- | --- | --- | | a:: Was your Blood pressure measured |
| |  |  |  |  |  | q410b (required) | | --- | --- | --- | --- | --- | --- | | b:: Did you give a Urine taken sample? |
| |  |  |  |  |  | q410c (required) | | --- | --- | --- | --- | --- | --- | | c:: Did you give a Blood sample |
| |  |  |  |  |  | q410d (required) | | --- | --- | --- | --- | --- | --- | | d:: Were you tested for HIV |
| |  |  |  |  |  | q410e (required) | | --- | --- | --- | --- | --- | --- | | e:: Was your Weight measured? |
| |  |  |  |  |  | q410f (required) | | --- | --- | --- | --- | --- | --- | | f:: Did you discuss with a health provider when the baby is due or will arrive? |
| |  |  |  |  | q411 (required) | | --- | --- | --- | --- | --- | | q411:: During any of your antenatal care visits, have you been told by a health worker about danger signs that might indicate problems with the pregnancy?  Question relevant when: ${q406} =1 |
| |  |  |  |  | q412 (required) | | --- | --- | --- | --- | --- | | q412:: During any of your antenatal care visits, have you discussed with a health worker a plan for your delivery?  Question relevant when: ${q406} =1 |
| |  |  |  |  |  | q413 | | --- | --- | --- | --- | --- | --- | | q413:: During that discussion, did you and the health worker talk about any of the following preparations for giving birth?  DK means "Don't know" |
| |  |  |  |  |  | q413_label | | --- | --- | --- | --- | --- | --- | | - |
| |  |  |  |  |  | q413a (required) | | --- | --- | --- | --- | --- | --- | | a:: Where you plan to deliver the baby? |
| |  |  |  |  |  | q413b (required) | | --- | --- | --- | --- | --- | --- | | b:: If you wanted to have a relative, friend or neighbour with you during labour or delivery? |
| |  |  |  |  |  | q413c (required) | | --- | --- | --- | --- | --- | --- | | c:: Transportation to where the baby would be born? |
| |  |  |  |  |  | q413d (required) | | --- | --- | --- | --- | --- | --- | | d:: What funds or finances you would use for delivery? |
| |  |  |  |  |  | q413e (required) | | --- | --- | --- | --- | --- | --- | | e:: Finding a skilled birth attendant to deliver your child |
| |  |  |  |  | q414 (required) | | --- | --- | --- | --- | --- | | q414:: As part of your antenatal care during this pregnancy, have you ever been given a mosquito net?  Question relevant when: ${q406} =1 |
| |  |  |  |  | q415 (required) | | --- | --- | --- | --- | --- | | q415:: Can you please tell me why you have not gone to any antenatal care visits at the health facility?  RECORD ALL MENTIONED<br/>PROBE: Any other reasons?  Question relevant when: ${q406} = 0 |
| |  |  |  |  | q415_oth (required) | | --- | --- | --- | --- | --- | | q415_oth:: Other (specify)  Question relevant when: selected( ${q415} , -96) |
| |  |  |  |  | q416 (required) | | --- | --- | --- | --- | --- | | q416:: At anytime during this pregnancy, have you been given an injection in the arm to prevent the baby from getting tetanus, that is, convulsions after birth? |
| |  |  |  |  | q417 | | --- | --- | --- | --- | --- | | q417:: During this pregnancy, how many times have you been given a tetanus injection?  Enter -98 for "Don't Know"  Question relevant when: ${q416} = 1 |
| |  |  |  |  | q418 | | --- | --- | --- | --- | --- | | q418:: Before this pregnancy, how many times did you get a tetanus injection?  Enter -98 for "Don't Know" |
| |  |  |  |  | q419 (required) | | --- | --- | --- | --- | --- | | q419:: During this pregnancy, have you taken any iron tablet or iron syrup?  SHOW TABLETS/SYRUP |
| |  |  |  |  | q420 (required) | | --- | --- | --- | --- | --- | | q420:: During this pregnancy, have you taken any folic acid supplements? |
| |  |  |  |  | q421 (required) | | --- | --- | --- | --- | --- | | q421:: During this pregnancy, have you taken any drugs for intestinal worms? |
| |  |  |  |  | q422 (required) | | --- | --- | --- | --- | --- | | q422:: During this pregnancy, have you taken SP/Fansidar to keep you from getting malaria? |
| |  |  |  |  | q423 (required) | | --- | --- | --- | --- | --- | | q423:: How many months pregnant were you when you took your first dose of SP/Fansidar?  NUMBER OF MONTHS<br/> Enter -98 for "Don't Know"  Question relevant when: ${q422} = 1 |
| |  |  |  |  | q424 (required) | | --- | --- | --- | --- | --- | | q424:: How many times have you taken SP/Fansidar during this pregnancy?  NUMBER OF TIMES<br/> Enter -98 for "Don't Know"  Question relevant when: ${q422} = 1 |
| |  |  |  |  | q425 (required) | | --- | --- | --- | --- | --- | | q425:: Did you get the SP/Fansidar during any antenatal care visit, during another visit to a health facility, or from another source?  "PROBE: Any other reasons?<br/> RECORD ALL MENTIONED"  Question relevant when: ${q422} = 1 |
| |  |  |  |  | q426 (required) | | --- | --- | --- | --- | --- | | q426:: Please tell me the reasons for not taking any medicine to prevent you from getting malaria?  PROBE: Any other reasons?<br/> RECORD ALL MENTIONED  Question relevant when: ${q422} = 0 or ${q422} = -98 |
| |  |  |  |  | q427_oth (required) | | --- | --- | --- | --- | --- | | q427_oth:: Other (specify)  Question relevant when: selected( ${q426} , -96) |
| |  |  |  |  | note_series4 | | --- | --- | --- | --- | --- | | Now I would like to ask you about the types of food that you may have eaten any time yesterday during the day or night.  I'm interested to know whether you had the item, even if combined with other foods.   Please include foods consumed outside of your home. |
| |  |  |  |  | q428 (required) | | --- | --- | --- | --- | --- | | q429:: How many main meals did you have at any time yesterday during the day or night? |
| |  |  |  |  |  | q429 | | --- | --- | --- | --- | --- | --- | | q429:: Did you eat (drink) any of the following, at any time yesterday during the day or the night? |
| |  |  |  |  |  | q429_label | | --- | --- | --- | --- | --- | --- | | - |
| |  |  |  |  |  | q429a (required) | | --- | --- | --- | --- | --- | --- | | a:: Milk, cheese, yoghurt, other dairy |
| |  |  |  |  |  | q429b (required) | | --- | --- | --- | --- | --- | --- | | b:: Bread, rice, tuwo or other grains |
| |  |  |  |  |  | q429c (required) | | --- | --- | --- | --- | --- | --- | | c:: White potato, cassava, yam, eba, or other foods from roots or tubers |
| |  |  |  |  |  | q429d (required) | | --- | --- | --- | --- | --- | --- | | d:: Pumpkin, squash, or other that is yellow or orange inside |
| |  |  |  |  |  | q429e (required) | | --- | --- | --- | --- | --- | --- | | e:: Any dark and leafy vegetables |
| |  |  |  |  |  | q429f (required) | | --- | --- | --- | --- | --- | --- | | f:: Ripe mangoes, pawpaw |
| |  |  |  |  |  | q429g (required) | | --- | --- | --- | --- | --- | --- | | g:: Other kinds of fruits or vegetables (or other local vitamin A rich fruits) |
| |  |  |  |  |  | q429h (required) | | --- | --- | --- | --- | --- | --- | | h:: Eggs |
| |  |  |  |  |  | q429i (required) | | --- | --- | --- | --- | --- | --- | | i:: Any kinds of meat, poultry, fish, or shellfish (or organ meats) |
| |  |  |  |  |  | q429j (required) | | --- | --- | --- | --- | --- | --- | | j:: Any foods made from beans, peas, lentils or nuts |
| |  |  |  |  |  | q429k (required) | | --- | --- | --- | --- | --- | --- | | k:: Any oil, fats, butter or foods made with these |
| |  |  |  |  |  | q429l (required) | | --- | --- | --- | --- | --- | --- | | l:: Sugary foods such as dates, sweets, biscuits |
| |  |  |  |  | sec5_note | | --- | --- | --- | --- | --- | | PREGNANCY AND ANTENATAL CARE (ANC) AMONG WOMEN WHO HAVE A CHILD UNDER 2 YEARS (RESPONDING ABOUT MOST RECENT / LAST BIRTH)   Now I would like to talk about your most recent pregnancy that resulted in a live birth. |
| |  |  |  |  | q501 (required) | | --- | --- | --- | --- | --- | | q501:: When you got pregnant with [ros_cal1], did you want to pregnant at that time? |
| |  |  |  |  | q502 (required) | | --- | --- | --- | --- | --- | | q502:: Did you want to have a baby later on or did you not want any more children?  Question relevant when: ${q501} = 0 |
| |  |  |  |  | q503 (required) | | --- | --- | --- | --- | --- | | q503:: How much longer did you want to wait?  Record in MONTHS<br/> Enter -98 for " Don't know"  Question relevant when: ${q502} = 1 |
| |  |  |  |  | q504 (required) | | --- | --- | --- | --- | --- | | q504:: During your pregnancy with [ros_cal1], did you see anyone for antenatal care? |
| |  |  |  |  | q505 (required) | | --- | --- | --- | --- | --- | | q505:: When did you first receive antenatal care for this pregnancy, that is, how many months pregnant were you?  Record in MONTHS<br/> Enter -98 for " Don't know"  Question relevant when: ${q504} = 1 |
| |  |  |  |  | q506 (required) | | --- | --- | --- | --- | --- | | q506:: Where did you receive antenatal care for this first visit during your pregnancy with [ros_cal1]?  Question relevant when: ${q504} = 1 |
| |  |  |  |  | q506_oth (required) | | --- | --- | --- | --- | --- | | q506_oth:: Other (specify)  Question relevant when: (selected( ${q506} , -96)) |
| |  |  |  |  | q507 (required) | | --- | --- | --- | --- | --- | | q507:: Whom did you see when you first received antenatal care your pregnancy with [ros_cal1]?  PROBE: Anyone else?<br/> RECORD ALL MENTIONED  Question relevant when: ${q504} = 1 |
| |  |  |  |  | q507a_oth (required) | | --- | --- | --- | --- | --- | | q507a_oth:: Other health personnel (specify)  Question relevant when: selected( ${q507} , -95) |
| |  |  |  |  | q507b_oth (required) | | --- | --- | --- | --- | --- | | q507b_oth:: Other (specify)  Question relevant when: selected( ${q507} , -96) |
| |  |  |  |  | q508 (required) | | --- | --- | --- | --- | --- | | q508:: How many check-ups did you have when you were pregnant with [ros_cal1]? That is, how many times did you receive antenatal care?  Enter -98 for " Don't know"  Question relevant when: ${q504} = 1 |
| |  |  |  |  |  | q509 | | --- | --- | --- | --- | --- | --- | | q509:: During any of your antenatal care visits for your pregnancy with [ros_cal1], were any of following done at least once? |
| |  |  |  |  |  | q509_label | | --- | --- | --- | --- | --- | --- | | - |
| |  |  |  |  |  | q509a (required) | | --- | --- | --- | --- | --- | --- | | a:: Was your blood pressure measured? |
| |  |  |  |  |  | q509b (required) | | --- | --- | --- | --- | --- | --- | | b:: Did you give a urine sample? |
| |  |  |  |  |  | q509c (required) | | --- | --- | --- | --- | --- | --- | | c:: Did you give a blood sample? |
| |  |  |  |  |  | q509d (required) | | --- | --- | --- | --- | --- | --- | | d:: Were you tested for HIV? |
| |  |  |  |  |  | q509e (required) | | --- | --- | --- | --- | --- | --- | | e:: Was your weight measured? |
| |  |  |  |  |  | q509f (required) | | --- | --- | --- | --- | --- | --- | | f:: Did a health provider ask if you had vaginal bleeding? |
| |  |  |  |  |  | q509g (required) | | --- | --- | --- | --- | --- | --- | | g:: Were you told to pay attention to the baby’s movements? |
| |  |  |  |  |  | q509h (required) | | --- | --- | --- | --- | --- | --- | | h:: Did you discuss with a health provider when the baby is due or will arrive? |
| |  |  |  |  | q510 (required) | | --- | --- | --- | --- | --- | | q510:: During any of your antenatal care visits during your pregnancy with [ros_cal1], were you told by a health worker about danger signs that might indicate problems with the pregnancy?  Question relevant when: ${q504} = 1 |
| |  |  |  |  | q511 (required) | | --- | --- | --- | --- | --- | | q511:: During any of your antenatal care visits during your pregnancy with [ros_cal1], did you discuss with a health worker a plan for your delivery?  Question relevant when: ${q504} = 1 |
| |  |  |  |  |  | q512 | | --- | --- | --- | --- | --- | --- | | q512:: During that discussion, did you and the health worker talk about any of the following preparations for giving birth?  DK means "Don't know" |
| |  |  |  |  |  | q512_label | | --- | --- | --- | --- | --- | --- | | - |
| |  |  |  |  |  | q512a (required) | | --- | --- | --- | --- | --- | --- | | a:: Where you plan to deliver the baby? |
| |  |  |  |  |  | q512b (required) | | --- | --- | --- | --- | --- | --- | | b:: If you wanted to have a relative, friend or neighbour with you during labour or delivery? |
| |  |  |  |  |  | q512c (required) | | --- | --- | --- | --- | --- | --- | | c:: Transportation to where the baby would be born? |
| |  |  |  |  |  | q512d (required) | | --- | --- | --- | --- | --- | --- | | d:: What funds or finances you would use for delivery? |
| |  |  |  |  |  | q512e (required) | | --- | --- | --- | --- | --- | --- | | e:: Finding a skilled birth attendant to deliver your child |
| |  |  |  |  | q513 (required) | | --- | --- | --- | --- | --- | | q513:: As part of your antenatal care during your pregnancy with [ros_cal1], were you ever given a mosquito net?  Question relevant when: ${q504} = 1 |
| |  |  |  |  | q514 (required) | | --- | --- | --- | --- | --- | | q514:: Can you please tell me why you did not go to any ANC visits at the health facility during your pregnancy with [ros_cal1]?  RECORD ALL MENTIONED <br/><br/>PROBE: Any other reasons?  Question relevant when: ${q504} = 0 |
| |  |  |  |  | q514b_oth (required) | | --- | --- | --- | --- | --- | | q514b_oth:: Other (specify)  Question relevant when: selected( ${q514} , -96) |
| |  |  |  |  | q515 (required) | | --- | --- | --- | --- | --- | | q515:: At anytime during your pregnancy with [ros_cal1], were you given an injection in the arm to prevent the baby from getting tetanus, that is, convulsions after birth?  Question relevant when: ${q504} = 0 or ${q504} = -98 |
| |  |  |  |  | q516 (required) | | --- | --- | --- | --- | --- | | q516:: During this pregnancy, how many times were you given a tetanus injection?  Question relevant when: ${q515} =1 |
| |  |  |  |  | q517 (required) | | --- | --- | --- | --- | --- | | q517:: Before this pregnancy, how many times did you get a tetanus injection?  Enter -98 for " Don't know"<br/> If 7 or more times, record "7"<br/> Enter 0 if "Never had tetanus"  Question relevant when: ${q515} =0 or ${q515} =1 |
| |  |  |  |  | q518 (required) | | --- | --- | --- | --- | --- | | q518:: During your pregnancy with [ros_cal1], did you take any iron tables or iron syrup?  SHOW TABLETS/SYRUP.  Question relevant when: ${q517} = 1 |
| |  |  |  |  | q519 (required) | | --- | --- | --- | --- | --- | | q519:: During your pregnancy with [ros_cal1], did you take any folic acid supplements? |
| |  |  |  |  | q520 (required) | | --- | --- | --- | --- | --- | | q520:: During that pregnancy, did you take any drugs for intestinal worms? |
| |  |  |  |  | q521 (required) | | --- | --- | --- | --- | --- | | q521:: During your pregnancy with [ros_cal1], did you take SP/Fansidar to keep you from getting malaria? |
| |  |  |  |  | q522 (required) | | --- | --- | --- | --- | --- | | q522:: How many months pregnant were you when you took your first dose of SP/Fansidar?  Number of months  Question relevant when: ${q521} = 1 |
| |  |  |  |  | q523 (required) | | --- | --- | --- | --- | --- | | q523:: How many times did you take SP/Fansidar during your pregnancy with [ros_cal1]  NUMBER OF TIMES<br/> Enter -98 for " Don't know"  Question relevant when: ${q521} = 1 |
| |  |  |  |  | q524 (required) | | --- | --- | --- | --- | --- | | q524:: Did you get the SP/Fansidar during any antenatal care visit, during another visit to a health facility, or from another source?  "PROBE: Any other reasons?<br/> RECORD ALL MENTIONED"  Question relevant when: ${q521} = 1 |
| |  |  |  |  | q524_oth (required) | | --- | --- | --- | --- | --- | | q524_oth:: Other (specify)  Question relevant when: selected( ${q524} , -96) |
| |  |  |  |  | q525 (required) | | --- | --- | --- | --- | --- | | q525:: Please tell me the reasons why you did not take any medicine to prevent you from getting malaria during your pregnancy with [ros_cal1] ?  PROBE: Any other reasons?<br/> RECORD ALL MENTIONED  Question relevant when: ${q521} = 0 |
| |  |  |  |  | q525_oth (required) | | --- | --- | --- | --- | --- | | q525_oth:: Other (specify)  Question relevant when: selected( ${q525} , -96) |
| |  |  |  |  | note_series5 | | --- | --- | --- | --- | --- | | Now I would like to ask you about the types of food that you may have eaten during your previous pregnancies.  I'm interested to know whether you had the item even if combined with other foods.   Please include foods consumed outside of your home. |
| |  |  |  |  | q526 (required) | | --- | --- | --- | --- | --- | | q526:: How many main meals did you typically have everyday during your pregnancy with [ros_cal1] |
| |  |  |  |  |  | q527 | | --- | --- | --- | --- | --- | --- | | q527:: Did you eat (drink) [NAME OF FOOD] at any time yesterday during the day or the night? |
| |  |  |  |  |  | q527_label | | --- | --- | --- | --- | --- | --- | | - |
| |  |  |  |  |  | q527a (required) | | --- | --- | --- | --- | --- | --- | | a:: Milk, cheese, yogurt, other dairy |
| |  |  |  |  |  | q527b (required) | | --- | --- | --- | --- | --- | --- | | b:: Bread, rice, tuwo or other grain |
| |  |  |  |  |  | q527c (required) | | --- | --- | --- | --- | --- | --- | | c:: White potato, cassava, yam, fufu, other foods from roots or tubers |
| |  |  |  |  |  | q527d (required) | | --- | --- | --- | --- | --- | --- | | d:: Pumpkin, squash, or other that is yellow or orange inside |
| |  |  |  |  |  | q527e (required) | | --- | --- | --- | --- | --- | --- | | e:: Any dark and leafy vegetables |
| |  |  |  |  |  | q527f (required) | | --- | --- | --- | --- | --- | --- | | f:: Ripe mangoes, pawpaw or other local vitamin A rich fruits |
| |  |  |  |  |  | q527g (required) | | --- | --- | --- | --- | --- | --- | | g:: Other kinds of fruits or vegetables |
| |  |  |  |  |  | q527h (required) | | --- | --- | --- | --- | --- | --- | | h:: Eggs |
| |  |  |  |  |  | q527i (required) | | --- | --- | --- | --- | --- | --- | | i:: Any kinds of meat, poultry, fish, or shellfish |
| |  |  |  |  |  | q527j (required) | | --- | --- | --- | --- | --- | --- | | j:: Any foods made from beans, peas, lentils or nuts |
| |  |  |  |  |  | q527k (required) | | --- | --- | --- | --- | --- | --- | | k:: Any oil, fats, butter or foods made with these |
| |  |  |  |  |  | q527l (required) | | --- | --- | --- | --- | --- | --- | | l:: Sugary foods |
| |  |  |  |  | q528 (required) | | --- | --- | --- | --- | --- | | q528:: Was [ros_cal1] weighed at birth? |
| |  |  |  |  |  | q529 (required) | | --- | --- | --- | --- | --- | --- | | q529:: How much did [ros_cal1] weight?   RECORD WEIGHT IN KILOGRAMS FROM HEALTHCARD IF AVAILABLE. |
| |  |  |  |  |  | q529a (required) | | --- | --- | --- | --- | --- | --- | | - |
| |  |  |  |  | q530 (required) | | --- | --- | --- | --- | --- | | q530:: Who assisted in the delivery of [ros_cal1]?  PROBE: Anyone else?<br/> IF RESPONDENT SAYS NO ONE ASSISTED, PROBE TO DETERMINE WHETHER ANY ADULTS WERE PRESENT AT THE DELIVERY<br/> <br/> RECORD ALL MENTIONED |
| |  |  |  |  | q530a_oth (required) | | --- | --- | --- | --- | --- | | q530a_oth:: Other health personnel (specify)  Question relevant when: selected( ${q530} , -95) |
| |  |  |  |  | q530b_oth (required) | | --- | --- | --- | --- | --- | | q530b_oth:: Other (specify)  Question relevant when: selected( ${q530} , -96) |
| |  |  |  |  | q531 (required) | | --- | --- | --- | --- | --- | | q531:: Where did you give birth to [ros_cal1]?  IF UNABLE TO DETERMINE IF PUBLIC OR PRIVATE SECTOR, WRITE THE NAME OF THE PLACE. |
| |  |  |  |  | q531a_oth (required) | | --- | --- | --- | --- | --- | | q531a_oth:: Other public sector (specify)  Question relevant when: ${q531} = -94 |
| |  |  |  |  | q531b_oth (required) | | --- | --- | --- | --- | --- | | q531b_oth:: Other private sector (specify)  Question relevant when: ${q531} = -95 |
| |  |  |  |  | q531c_oth (required) | | --- | --- | --- | --- | --- | | q531c_oth:: Other (specify)  Question relevant when: ${q531} = -96 |
| |  |  |  |  | q532 (required) | | --- | --- | --- | --- | --- | | q532:: When you were in labor or giving birth to [ros_cal1] did you ever feel like you were being ignored or neglected by health facility staff?  Question relevant when: ${q531} >= 3 and ${q531} <7 |
| |  |  |  |  | q533 (required) | | --- | --- | --- | --- | --- | | q533:: When you were in labor or giving birth to [ros_cal1] did you have privacy, for example, were you surrounded by curtains, or did you have a separate room?  Question relevant when: ${q531} >= 3 and ${q531} <7 |
| |  |  |  |  | q534 (required) | | --- | --- | --- | --- | --- | | q534:: Can you please tell me why you did not give birth in a health facility?  RECORD ALL MENTIONED<br/><br/>PROBE: Any other reasons?  Question relevant when: ${q531} <= 2 |
| |  |  |  |  | q535 (required) | | --- | --- | --- | --- | --- | | q535:: Was [ros_cal1] wiped dry within a few minutes after birth? |
| |  |  |  |  | q536 (required) | | --- | --- | --- | --- | --- | | q536:: Was [ros_cal1] bathed immediately after birth? |
| |  |  |  |  |  | q537 (required) | | --- | --- | --- | --- | --- | --- | | q537:: How long after birth was [ros_cal1] bathed for the first time?  IF LESS THAN ONE HOUR, RECORD '00' HOURS; IF LESS THEN 24 HOURS, RECORD HOURS; OTHERWISE RECORD DAYS. |
| |  |  |  |  |  | q537a (required) | | --- | --- | --- | --- | --- | --- | | - |
| |  |  |  |  |  | q538_note | | --- | --- | --- | --- | --- | --- | | Immediately after the birth of [ros_cal1], were any of the following actions taken? |
| |  |  |  |  |  | q538_label | | --- | --- | --- | --- | --- | --- | | - |
| |  |  |  |  |  | q538a (required) | | --- | --- | --- | --- | --- | --- | | a:: Child placed directly on the bare skin or your chest |
| |  |  |  |  |  | q538b (required) | | --- | --- | --- | --- | --- | --- | | b:: A new blade used to cut the child's cord |
| |  |  |  |  |  | q538c (required) | | --- | --- | --- | --- | --- | --- | | c:: Chlorhexidine applied to the child's stump |
| |  |  |  |  |  | q538d (required) | | --- | --- | --- | --- | --- | --- | | d:: Given misoprostol (Miso Miso) |
| |  |  |  |  | note_series6 | | --- | --- | --- | --- | --- | | Now I would like to talk to you about checks on [ros_cal1]'s health after delivery – for example, someone examining [ros_cal1], checking the cord, or seeing if [ros_cal1] is OK. |
| |  |  |  |  |  | q539 | | --- | --- | --- | --- | --- | --- | | q539:: During the first two days after [ros_cal1] birth, did any health care provider do the following: |
| |  |  |  |  |  | q539_label | | --- | --- | --- | --- | --- | --- | | - |
| |  |  |  |  |  | q539a (required) | | --- | --- | --- | --- | --- | --- | | a:: Examine the Cord |
| |  |  |  |  |  | q539b (required) | | --- | --- | --- | --- | --- | --- | | b:: Measure [ros_cal1] temperature |
| |  |  |  |  |  | q539c (required) | | --- | --- | --- | --- | --- | --- | | c:: Check if the child has been feeding since birth |
| |  |  |  |  |  | q539d (required) | | --- | --- | --- | --- | --- | --- | | d:: Check child for jaundice |
| |  |  |  |  |  | q539e (required) | | --- | --- | --- | --- | --- | --- | | e:: Check if the child has problems breathing |
| |  |  |  |  |  | q539f (required) | | --- | --- | --- | --- | --- | --- | | f:: Check if the child has convulsions |
| |  |  |  |  |  | q539g (required) | | --- | --- | --- | --- | --- | --- | | g:: Check if the child has weakness or /lethargy |
| |  |  |  |  |  | q539h (required) | | --- | --- | --- | --- | --- | --- | | h:: Check if the child has swollen/red umbilicus with pus |
| |  |  |  |  |  | q539i (required) | | --- | --- | --- | --- | --- | --- | | i:: Check if the child has boils on skin |
| |  |  |  |  |  | q539j (required) | | --- | --- | --- | --- | --- | --- | | j:: Check if the child has pus in eyes |
| |  |  |  |  |  | q539k (required) | | --- | --- | --- | --- | --- | --- | | k:: Counsel you on the danger signs for the newborn |
| |  |  |  |  |  | q539l (required) | | --- | --- | --- | --- | --- | --- | | l:: Counsel you on breastfeeding |
| |  |  |  |  |  | q539m (required) | | --- | --- | --- | --- | --- | --- | | m:: Counsel you on nutrition for new mothers |
| |  |  |  |  | note_series7 | | --- | --- | --- | --- | --- | | Now I would like to talk to you about checks on your health after [ros_cal1] was born, for example, someone asking you questions about your health or examining you. |
| |  |  |  |  | q540 (required) | | --- | --- | --- | --- | --- | | q540:: Did anyone check on your health after you gave birth to [ros_cal1]? |
| |  |  |  |  |  | q541 (required) | | --- | --- | --- | --- | --- | --- | | q541:: How long after delivery did the first check take place?  IF LESS THAN ONE DAY, RECORD HOURS<br/>IF LESS THAN ONE WEEK, RECORD DAYS |
| |  |  |  |  |  | q541a (required) | | --- | --- | --- | --- | --- | --- | | - |
| |  |  |  |  | q542 (required) | | --- | --- | --- | --- | --- | | q546:: Who checked on your health at that time?  PROBE FOR MOST QUALIFIED PERSON  Question relevant when: ${q540} = 1 |
| |  |  |  |  | q542a_oth (required) | | --- | --- | --- | --- | --- | | q542a_oth:: Other health personnel (specify)  Question relevant when: ${q542} = -95 |
| |  |  |  |  | q542b_oth (required) | | --- | --- | --- | --- | --- | | q542b_oth:: Other (specify)  Question relevant when: ${q542} = -96 |
| |  |  |  |  | q543 (required) | | --- | --- | --- | --- | --- | | q543:: After you gave birth to [ros_cal1], did anyone talk to you about using a modern method of contraception postpartum? |
| |  |  |  |  | sec6_note | | --- | --- | --- | --- | --- | | PREGNANCY, ANTE-NATAL CARE and POST-NATAL CARE IDEATION   Now I am going to ask you about a series of actions you could do and for each action I would like for you to tell me if you would be very likely, somewhat likely, somewhat unlikely, or very unlikely to do each action. |
| |  |  |  |  | sec6a_note | | --- | --- | --- | --- | --- | | IDEATIONAL FACTORS: KNOWLEDGE, BELIEFS AND ATTITUDES |
| |  |  |  |  | q601 (required) | | --- | --- | --- | --- | --- | | q601:: How many times should a woman receive a check-up during one pregnancy?  Record -98 for "Don't know" |
| |  |  |  |  | q602 (required) | | --- | --- | --- | --- | --- | | q602:: In your opinion, when should a pregnant woman go for antenatal care for the first time? |
| |  |  |  |  | q602_oth (required) | | --- | --- | --- | --- | --- | | q602_oth:: Other (specify)  Question relevant when: ${q601} = -96 |
| |  |  |  |  | q603 (required) | | --- | --- | --- | --- | --- | | q603:: In your opinion, if a pregnant woman goes for antenatal care at a health facility what are the benefits for herself?  RECORD ALL MENTIONED<br/><br/>PROBE: Any other benefits? |
| |  |  |  |  | q603_oth (required) | | --- | --- | --- | --- | --- | | q603_oth:: Other (specify)  Question relevant when: selected( ${q603} , -96) |
| |  |  |  |  | q604 (required) | | --- | --- | --- | --- | --- | | q604:: What are the dangers signs for pregnancy? That is, what signs and symptoms let you know that a pregnant woman needs to go to a health facility immediately?  RECORD ALL MENTIONED<br/><br/>PROBE: Any other benefits? |
| |  |  |  |  | q604_oth (required) | | --- | --- | --- | --- | --- | | q604_oth:: Other (specify)  Question relevant when: selected( ${q604} , -96) |
| |  |  |  |  | q605 (required) | | --- | --- | --- | --- | --- | | q605:: What can happen to a pregnant woman's unborn baby if the pregnant woman gets malaria?  RECORD ALL MENTIONED<br/><br/>PROBE: Any other benefits? |
| |  |  |  |  | q605_oth (required) | | --- | --- | --- | --- | --- | | q605_oth:: Other (specify)  Question relevant when: selected( ${q605} , -96) |
| |  |  |  |  | q606 (required) | | --- | --- | --- | --- | --- | | q606:: What can a mother do to protect the health of her newborn baby immediately after delivery?  RECORD ALL MENTIONED<br/><br/>PROBE: Any other benefits? |
| |  |  |  |  | q606_oth (required) | | --- | --- | --- | --- | --- | | q606_oth:: Other (specify)  Question relevant when: selected( ${q606} , -96) |
| |  |  |  |  | q607 (required) | | --- | --- | --- | --- | --- | | q607:: What things can a new mother do to make sure she recovers well from child birth?  RECORD ALL MENTIONED<br/><br/>PROBE: Any other benefits? |
| |  |  |  |  | q607_oth (required) | | --- | --- | --- | --- | --- | | q607_oth:: Other (specify)  Question relevant when: selected( ${q607} , -96) |
| |  |  |  |  | sec6b_note | | --- | --- | --- | --- | --- | | IDEATIONAL FACTORS: NORMS   Now I am going to read some statements again about pregnancy and for each one I would like to know if you strongly agree, somewhat agree, somewhat disagree, or strongly disagree.  INTERVIEWER: DO NOT READ THE "DON'T KNOW" RESPONSE AND ONLY USE IF THE RESPONDENT IS NOT ABLE TO PROVIDE ANOTHER RESPONSE. |
| |  |  |  |  | q608 (required) | | --- | --- | --- | --- | --- | | q608:: It is important for a woman to discuss her pregnancy with her husband so they make decisions together. |
| |  |  |  |  | q609 (required) | | --- | --- | --- | --- | --- | | q609:: Pregnant women only need antenatal care if they are sick. |
| |  |  |  |  | q610 (required) | | --- | --- | --- | --- | --- | | q610:: Only women who are pregnant for the first time need antenatal care. |
| |  |  |  |  | q611 (required) | | --- | --- | --- | --- | --- | | q611:: It is better to use traditional healthcare during pregnancy rather than going to a health facility for antenatal care. |
| |  |  |  |  | q612 (required) | | --- | --- | --- | --- | --- | | q612:: The health facility is the best place to deliver a baby |
| |  |  |  |  | q613 (required) | | --- | --- | --- | --- | --- | | q613:: Pregnant women who go to a health facility for at least 4 antenatal car visits have safer pregnancies and healthier children. |
| |  |  |  |  | q614 (required) | | --- | --- | --- | --- | --- | | q634:: Besides yourself, who else may influence your decision to go to at least 4 antenatal care visits at a health facility during pregnancy? |
| |  |  |  |  | q614_oth (required) | | --- | --- | --- | --- | --- | | q614_oth:: Other (specify)  Question relevant when: selected( ${q614} , -96) |
| |  |  |  |  | q615 (required) | | --- | --- | --- | --- | --- | | q615:: Besides yourself, who else may influence your decision to give birth in a health facility? |
| |  |  |  |  | q615_oth (required) | | --- | --- | --- | --- | --- | | q615_oth:: Other (specify)  Question relevant when: selected( ${q615} , -96) |
| |  |  |  |  | sec6c_note | | --- | --- | --- | --- | --- | | IDEATIONAL FACTORS: SELF-EFFICACY   Now I am going to ask you a series of questions about actions you could take and for each question I would like for you to tell me how confident you feel in your ability to do each action. For each question please tell me if you are very confident, somewhat confident, somewhat uncertain, or very uncertain   Interviewer: Do not read "DON'T KNOW" response and only use if respondent is not able to provide another answer. |
| |  |  |  |  | q616 (required) | | --- | --- | --- | --- | --- | | q616:: How confident are you that you could start a conversation with your husband/partner about attending antenatal care at a health facility |
| |  |  |  |  | q617 (required) | | --- | --- | --- | --- | --- | | q617:: How confident are you that you could get to a health facility for antenatal care? |
| |  |  |  |  | q618 (required) | | --- | --- | --- | --- | --- | | q618:: How confident are you that you could start a conversation with your husband/partner about giving birth in a health facility? |
| |  |  |  |  | q619 (required) | | --- | --- | --- | --- | --- | | q619:: How confident are you that you could get to a health facility to give birth? |
| |  |  |  |  |  | q620 | | --- | --- | --- | --- | --- | --- | | For your next pregnancy, how likely are you to |
| |  |  |  |  |  | q620a (required) | | --- | --- | --- | --- | --- | --- | | a:: go to at least ONE antenatal care visit at a health facility? |
| |  |  |  |  |  | q620b (required) | | --- | --- | --- | --- | --- | --- | | b:: go to at least FOUR antenatal care visit at a health facility? |
| |  |  |  |  |  | q620c (required) | | --- | --- | --- | --- | --- | --- | | c:: go to at least EIGHT antenatal care visit at a health facility? |
| |  |  |  |  | q621 (required) | | --- | --- | --- | --- | --- | | q621:: For your next pregnancy how likely are you to take SP/Fansidar to prevent malaria during pregnancy? |
| |  |  |  |  | q622 (required) | | --- | --- | --- | --- | --- | | q622:: For your next pregnancy, how likely are you to deliver in a health facility? |
| |  |  |  |  | q702 (required) | | --- | --- | --- | --- | --- | | q702:: Did you ever breastfeed [ros_cal1] ? |
| |  |  |  |  |  | q703 (required) | | --- | --- | --- | --- | --- | --- | | q703:: How long after birth of [ros_cal1] did you first put him/her to the breast?  IF LESS THAN ONE HOUR, RECORD ‘00’ HOURS<br/>IF LESS THAN 24 HOURS, RECORD HOURS<br/>OTHERWISE, RECORD DAYS |
| |  |  |  |  |  | q703a (required) | | --- | --- | --- | --- | --- | --- | | - |
| |  |  |  |  | q704 (required) | | --- | --- | --- | --- | --- | | q704:: In the first three days after delivery of [ros_cal1], was he/she given anything to drink other than breastmilk/colostrum, for example, was he/she given any water?  Question relevant when: ${q702} = 1 |
| |  |  |  |  | q705 (required) | | --- | --- | --- | --- | --- | | q705:: Please tell me the reasons why you chose not to exclusively breastfeed [ros_cal1] during the first 6 months of [ros_cal1]'s life.  PROBE: Any other reason?<br/> RECORD ALL MENTIONED  Question relevant when: ${q704} = 1 |
| |  |  |  |  | q705a_oth (required) | | --- | --- | --- | --- | --- | | q705a_oth:: Other (specify)  Question relevant when: selected( ${q705} , -96) |
| |  |  |  |  | q705b_oth (required) | | --- | --- | --- | --- | --- | | q705b_oth:: Other problems with breastfeeding (specify)  Question relevant when: selected( ${q705} , -95) |
| |  |  |  |  | q705c_oth (required) | | --- | --- | --- | --- | --- | | q705c_oth:: Others opposed (specify)  Question relevant when: selected( ${q705} , -94) |
| |  |  |  |  | q706 (required) | | --- | --- | --- | --- | --- | | q706:: Are you still breastfeeding [ros_cal1]?  Question relevant when: ${q702} = 1 |
| |  |  |  |  | q707 (required) | | --- | --- | --- | --- | --- | | q707:: Are you giving [ros_cal1] soft or semi-solid food? |
| |  |  |  |  |  | q708 (required) | | --- | --- | --- | --- | --- | --- | | q708:: How old was [ros_cal1] when you first started giving him/her soft or semi-solid food?   IF LESS THAN ONE MONTH, RECORD WEEKS OTHERWISE, RECORD MONTHS |
| |  |  |  |  |  | q708a (required) | | --- | --- | --- | --- | --- | --- | | - |
| |  |  |  |  | note_series8 | | --- | --- | --- | --- | --- | | Now I would like to ask you about the types of foods that [[ros_cal1]] may have had at any time yesterday during the day or the night.   I am interested to know whether [ros_cal1] had the item even if combined with other foods.  Please include foods consumed outside of your home.  Question relevant when: ${q707} = 1 |
| |  |  |  |  |  | q709 | | --- | --- | --- | --- | --- | --- | | q709:: Did [ros_cal1] eat any of the following food yesterday during the day or the night? |
| |  |  |  |  |  | q709_label | | --- | --- | --- | --- | --- | --- | | - |
| |  |  |  |  |  | q709a (required) | | --- | --- | --- | --- | --- | --- | | q709a:: Milk, cheese, yogurt, other dairy? |
| |  |  |  |  |  | q709b (required) | | --- | --- | --- | --- | --- | --- | | q709b:: Bread, rice, tuwo or other food made from grains? |
| |  |  |  |  |  | q709c (required) | | --- | --- | --- | --- | --- | --- | | q709c:: White potato other foods from roots or tubers? |
| |  |  |  |  |  | q709d (required) | | --- | --- | --- | --- | --- | --- | | q709d:: Pumpkin, squash, or other that is yellow or orange inside? |
| |  |  |  |  |  | q709e (required) | | --- | --- | --- | --- | --- | --- | | q709e:: Any dark and leafy vegetables? |
| |  |  |  |  |  | q709f (required) | | --- | --- | --- | --- | --- | --- | | q709f:: Ripe mangoes, pawpaw (or other local vitamin A rich fruits)? |
| |  |  |  |  |  | q709g (required) | | --- | --- | --- | --- | --- | --- | | q709g:: Any other kinds of fruits or vegetables? |
| |  |  |  |  |  | q709h (required) | | --- | --- | --- | --- | --- | --- | | q709h:: Eggs? |
| |  |  |  |  |  | q709i (required) | | --- | --- | --- | --- | --- | --- | | q709i:: Any kind of meat, poultry, fish, or shellfish (and organ meats) |
| |  |  |  |  |  | q709j (required) | | --- | --- | --- | --- | --- | --- | | q709j:: Any foods made from beans, peas, lentils or nuts? |
| |  |  |  |  |  | q709k (required) | | --- | --- | --- | --- | --- | --- | | q709k:: Any oil, fats, butter, or foods made with these? |
| |  |  |  |  |  | q709l (required) | | --- | --- | --- | --- | --- | --- | | q709l:: Sugary foods such as dates, sweets, biscuits? |
| |  |  |  |  | q710 (required) | | --- | --- | --- | --- | --- | | q710:: How many times did [ros_cal1] eat solid, semi-solid, or soft food yesterday during the day or at night?  IF 7 OR MORE, RECORD ‘7”<br/> Record "-98" if "Don't know"  Question relevant when: ${q707} = 1 |
| |  |  |  |  | q711 (required) | | --- | --- | --- | --- | --- | | q711:: Please tell me why you chose to not breastfeed [ros_cal1]?  PROBE: Any other reason?<br/> RECORD ALL MENTIONED  Question relevant when: ${q702} = 0 |
| |  |  |  |  | q711a_oth (required) | | --- | --- | --- | --- | --- | | q711a_oth:: Other (specify)  Question relevant when: selected( ${q711} , -96) |
| |  |  |  |  | q711b_oth (required) | | --- | --- | --- | --- | --- | | q711b_oth:: Other problems with breastfeeding (specify)  Question relevant when: selected( ${q711} , -95) |
| |  |  |  |  | q711c_oth (required) | | --- | --- | --- | --- | --- | | q711c_oth:: Others opposed (specify)  Question relevant when: selected( ${q711} , -94) |
| |  |  |  |  | sec7a_note | | --- | --- | --- | --- | --- | | IDEATIONAL FACTORS: KNOWLEDGE, BELIEF AND ATTITUDES |
| |  |  |  |  | q712 (required) | | --- | --- | --- | --- | --- | | q712:: In your opinion, what are the benefits, if any, for mothers who exclusively breastfeed their infant for the first six months of life?  PROBE: Any other benefits?<br/> RECORD ALL MENTIONED |
| |  |  |  |  | q712_oth (required) | | --- | --- | --- | --- | --- | | q712_oth:: Other (specify)  Question relevant when: selected( ${q712} , -96) |
| |  |  |  |  | q713 (required) | | --- | --- | --- | --- | --- | | q713:: What are the benefits, if any, for her child?  PROBE: Any other benefit?<br/> RECORD ALL MENTIONED |
| |  |  |  |  | q713_oth (required) | | --- | --- | --- | --- | --- | | q713_oth:: Other (specify)  Question relevant when: selected( ${q713} , -96) |
| |  |  |  |  | q714 (required) | | --- | --- | --- | --- | --- | | q714:: Besides yourself, who else may influence your decision about whether to breastfeed or not?  PROBE: Any one else?<br/> RECORD ALL MENTIONED |
| |  |  |  |  | q714_oth (required) | | --- | --- | --- | --- | --- | | q714_oth:: Other (specify)  Question relevant when: selected( ${q714} , -96) |
| |  |  |  |  |  | q715 (required) | | --- | --- | --- | --- | --- | --- | | q715:: In your opinion, what is the ideal age to begin introducing complementary food in addition to breastmilk? |
| |  |  |  |  |  | q715a (required) | | --- | --- | --- | --- | --- | --- | | - |
| |  |  |  |  | q716 (required) | | --- | --- | --- | --- | --- | | q716:: In your opinion, how long should a woman breastfeed her child?  PROBE: Until what age is it recommended that a mother continues breastfeeding? |
| |  |  |  |  | q716_oth (required) | | --- | --- | --- | --- | --- | | q716_oth:: Other (specify)  Question relevant when: ${q716} = -96 |
| |  |  |  |  | q717 (required) | | --- | --- | --- | --- | --- | | q717:: How can a mother recognize that her child is not getting enough nutrition in his/her diet?  PROBE: Any other signs? |
| |  |  |  |  | q717_oth (required) | | --- | --- | --- | --- | --- | | q717_oth:: Other (specify)  Question relevant when: selected( ${q717} , -96) |
| |  |  |  |  | sec7b_note | | --- | --- | --- | --- | --- | | IDEATIONAL FACTORS: BEHAVIORAL INTENTIONS   Now I am going to read to you a series of statements about breastfeeding. For each statement please tell me if you strongly agree, somewhat agree, somewhat disagree, or strongly disagree.  INTERVIEWER: DO NOT READ THE "DON'T KNOW" RESPONSE AND ONLY USE IF THE RESPONDENT IS NOT ABLE TO PROVIDE ANOTHER RESPONSE. |
| |  |  |  |  | q718b (required) | | --- | --- | --- | --- | --- | | q718b:: Breastmilk contains all the nutrients a baby needs during the first 6 months of his/her life. |
| |  |  |  |  | q718c (required) | | --- | --- | --- | --- | --- | | q718b:: A mother's breastmilk immediately after birth is bad milk. |
| |  |  |  |  | q719 (required) | | --- | --- | --- | --- | --- | | q719:: How likely are you to exclusively breastfeed your newborn for the first 6 months of life, that is, only give your infant breastmilk, not even water, for the first six months after birth? |
| |  |  |  |  | sec7c_note | | --- | --- | --- | --- | --- | | IDEATIONAL FACTORS: NORMS   Now I am going to read some statements again about breastfeeding and for each one I would like to know if you strongly agree, somewhat agree, somewhat disagree, or strongly disagree  INTERVIEWER: Do not read "Don't know" response and only use if respondent is not able to provide another answer. |
| |  |  |  |  | q720 (required) | | --- | --- | --- | --- | --- | | q720:: Most women in my community only give their infants breastmilk, and no water, for the first 6 months after birth. |
| |  |  |  |  | q721 (required) | | --- | --- | --- | --- | --- | | q721:: It is important for mothers to only give their child breastmilk during the first 6 months after birth. |
| |  |  |  |  | sec7d_note | | --- | --- | --- | --- | --- | | IDEATIONAL FACTORS: SELF-EFFICACY |
| |  |  |  |  | q722 (required) | | --- | --- | --- | --- | --- | | q722:: How confident are you that you could exclusively breastfeed your child for the first six months of life? |
| |  |  |  |  | q723 (required) | | --- | --- | --- | --- | --- | | q723:: How confident are you that you could start a conversation with your husband / partner about breastfeeding your child? |
| |  |  |  |  | sec8a_note | | --- | --- | --- | --- | --- | | ACUTE RESPIRATORY INFECTION/COUGH WITH RAPID OR DIFFICULT BREATHING   Now I would like to talk about any illnesses that your youngest child may have had. |
| |  |  |  |  | q801 (required) | | --- | --- | --- | --- | --- | | q801:: Has [ros_cal1] had an illness with a cough at any time in the last 2 weeks? |
| |  |  |  |  | q802 (required) | | --- | --- | --- | --- | --- | | q802:: When [ros_cal1] had a cough, was [ros_cal1]'s breathing faster than usual with short, rapid breaths or did he/she have difficulty breathing?  Question relevant when: ${q801} = 1 |
| |  |  |  |  | q803 (required) | | --- | --- | --- | --- | --- | | q803:: Was the fast or difficult breathing due to a problem in the chest or to a blocked or runny nose?  Question relevant when: ${q802} = 1 |
| |  |  |  |  | q803_oth (required) | | --- | --- | --- | --- | --- | | q803_oth:: Other (specify)  Question relevant when: ${q803} = -96 |
| |  |  |  |  | q804 (required) | | --- | --- | --- | --- | --- | | q804:: Did you seek advice or treatment for the illness?  Question relevant when: ${q801} = 1 |
| |  |  |  |  | q805 (required) | | --- | --- | --- | --- | --- | | q805:: Where did you seek advice or treatment?  PROBE: Anywhere else?<br/> IF UNABLE TO DETERMINE IF PUBLIC OR PIRVATE SECTOR, WRITE THE NAME OF THE PLACE.  Question relevant when: ${q804} = 1 |
| |  |  |  |  | q806a_oth (required) | | --- | --- | --- | --- | --- | | q806a_oth:: Other (specify)  Question relevant when: selected( ${q805} , -96) |
| |  |  |  |  | q806b_oth (required) | | --- | --- | --- | --- | --- | | q806b_oth:: Other private sector (specify)  Question relevant when: selected( ${q805} , -95) |
| |  |  |  |  | q806c_oth (required) | | --- | --- | --- | --- | --- | | q806c_oth:: Others public sector (specify)  Question relevant when: selected( ${q805} , -94) |
| |  |  |  |  | q807 (required) | | --- | --- | --- | --- | --- | | q807:: What were the most important reasons for choosing where to seek advice or treatment for [ros_cal1]?  RECORD ALL MENTIONED  Question relevant when: ${q804} = 1 |
| |  |  |  |  | q807_oth (required) | | --- | --- | --- | --- | --- | | q807_oth:: Other (specify)  Question relevant when: selected( ${q807} , -96) |
| |  |  |  |  | q808 (required) | | --- | --- | --- | --- | --- | | q808:: At any time during the illness, did [ros_cal1] take any medicines for the illness?  Question relevant when: ${q801} = 1 |
| |  |  |  |  | q809 (required) | | --- | --- | --- | --- | --- | | q809:: What medicines did [ros_cal1] take?  Any other medicines?<br/> <br/>RECORD ALL MENTIONED  Question relevant when: ${q808} = 1 |
| |  |  |  |  | q809a_oth (required) | | --- | --- | --- | --- | --- | | Other (specify)  Question relevant when: selected( ${q809} , -96) |
| |  |  |  |  | q809b_oth (required) | | --- | --- | --- | --- | --- | | Other antimalarial (specify)  Question relevant when: selected( ${q809} , -95) |
| |  |  |  |  | q810 (required) | | --- | --- | --- | --- | --- | | q810:: Please tell me why did you NOT seek advice or treatment for [ros_cal1]?  PROBE: Any other reason?<br/> RECORD ALL MENTIONED  Question relevant when: ${q804} = 0 |
| |  |  |  |  | q810_oth (required) | | --- | --- | --- | --- | --- | | q810_oth:: Other (specify)  Question relevant when: selected( ${q810} , -96) |
| |  |  |  |  | diarrhea8_grp | | --- | --- | --- | --- | --- | | DIARRHOEA |
| |  |  |  |  | q811 (required) | | --- | --- | --- | --- | --- | | q811:: Has [ros_cal1] had diarrhoea at any time in the last 2 weeks? |
| |  |  |  |  | q812 (required) | | --- | --- | --- | --- | --- | | q812:: How much was [ros_cal1] given to drink during the diarrhea including breastmilk: Was [ros_cal1] given less than usual to drink, about the same amount, or more than usual to drink?  IF LESS - PROBE: Was [ros_cal1] given much less than usual to drink or somewhat less?  Question relevant when: ${q811} = 1 |
| |  |  |  |  | q813 (required) | | --- | --- | --- | --- | --- | | q813:: When [ros_cal1] had diarrhea, was [ros_cal1] given less than usual to eat, about the same amount, more than usual, or nothing to eat?  IF LESS, PROBE: Was [ros_cal1] given much less than usual to eat or somewhat less?  Question relevant when: ${q811} = 1 |
| |  |  |  |  | q814 (required) | | --- | --- | --- | --- | --- | | q814:: Did you seek advice or treatment from any source for the diarrhea ?  Question relevant when: ${q811} = 1 |
| |  |  |  |  | q815 (required) | | --- | --- | --- | --- | --- | | q815:: Where did you seek advice or treatment?  PROBE: Anywhere else?<br/> IF UNABLE TO DETERMINE IF PUBLIC OR PIRVATE SECTOR, WRITE THE NAME OF THE PLACE.  Question relevant when: ${q814} = 1 |
| |  |  |  |  | q815a_oth (required) | | --- | --- | --- | --- | --- | | q815a_oth:: Other (specify)  Question relevant when: selected( ${q815} , -96) |
| |  |  |  |  | q815c_oth (required) | | --- | --- | --- | --- | --- | | q815c_oth:: Others public sector (specify)  Question relevant when: selected( ${q815} , -94) |
| |  |  |  |  | q816 (required) | | --- | --- | --- | --- | --- | | q816:: What were the most important reasons for choosing where to seek advice or treatment for [ros_cal1]'s diarrhea?  RECORD ALL MENTIONED  Question relevant when: ${q814} = 1 |
| |  |  |  |  | q816_oth (required) | | --- | --- | --- | --- | --- | | q816_oth:: Other (specify)  Question relevant when: selected( ${q816} , -96) |
| |  |  |  |  |  | q817 | | --- | --- | --- | --- | --- | --- | | q817:: Was [ros_cal1] given any of the following at any time when [ros_cal1] had diarrhea: |
| |  |  |  |  |  | q817_label | | --- | --- | --- | --- | --- | --- | | - |
| |  |  |  |  |  | q817a (required) | | --- | --- | --- | --- | --- | --- | | q817a:: Fluid made from ORS packet [Ruwan gisiri de sukari] |
| |  |  |  |  |  | q817b (required) | | --- | --- | --- | --- | --- | --- | | q817b:: Prepacked ORS fluid |
| |  |  |  |  |  | q817c (required) | | --- | --- | --- | --- | --- | --- | | q817c:: Other homemade or traditional fluid |
| |  |  |  |  |  | q817d (required) | | --- | --- | --- | --- | --- | --- | | q817d:: Zinc |
| |  |  |  |  | q818 (required) | | --- | --- | --- | --- | --- | | q818: What (else) was given to treat the diarrhea?  RECORD ALL MENTIONED<br/>PROBE: Anything else? <br/><br/>RELEVANT FOR ALL KIDS WITH REPORTED DIARRHEA IN PREVIOUS 2 WEEKS (WHETHER SOUGHT CARE OR NOT)  Question relevant when: ${q811} = 1 or ${q814} = 1 |
| |  |  |  |  | q818a_oth (required) | | --- | --- | --- | --- | --- | | q818a_oth:: Other (specify)  Question relevant when: selected( ${q818} , -96) |
| |  |  |  |  | q818b_oth (required) | | --- | --- | --- | --- | --- | | q818b_oth:: Other pill or syrup (not antibiotic or antimotility) specify_____  Question relevant when: selected( ${q818} , -95) |
| |  |  |  |  | q819 (required) | | --- | --- | --- | --- | --- | | q819:: Please tell me why did you NOT seek advice or treatment for [ros_cal1] ?  PROBE: Any other reasons?<br/> <br/> RECORD ALL MENTIONED  Question relevant when: ${q814} = 0 |
| |  |  |  |  | q819_oth (required) | | --- | --- | --- | --- | --- | | q819_oth:: Other (specify)  Question relevant when: selected( ${q819} , -96) |
| |  |  |  |  | fever8_grp | | --- | --- | --- | --- | --- | | FEVER |
| |  |  |  |  | q820 (required) | | --- | --- | --- | --- | --- | | q820:: Has [ros_cal1] had an illness with a fever at any time in the last 2 weeks? |
| |  |  |  |  | q821 (required) | | --- | --- | --- | --- | --- | | q821:: At any time during the illness did [ros_cal1] have blood taken from his/her finger or heel for testing?  Question relevant when: ${q820} = 1 |
| |  |  |  |  | q822 (required) | | --- | --- | --- | --- | --- | | q822:: Did you seek advice or treatment from any source for [ros_cal1]'s fever?  Question relevant when: ${q820} = 1 |
| |  |  |  |  | q823 (required) | | --- | --- | --- | --- | --- | | q823:: Where did you seek advice or treatment?  RECORD ALL MENTIONED <br/>PROBE: Anywhere else?<br/> <br/>IF UNABLE TO DETERMINE IF PUBLIC OR PIRVATE SECTOR, WRITE THE NAME OF THE PLACE.  Question relevant when: ${q822} = 1 |
| |  |  |  |  | q824a_oth (required) | | --- | --- | --- | --- | --- | | q824a_oth:: Other (specify)  Question relevant when: selected( ${q823} , -96) |
| |  |  |  |  | q824b_oth (required) | | --- | --- | --- | --- | --- | | q824b_oth:: Other private sector (specify)  Question relevant when: selected( ${q823} , -95) |
| |  |  |  |  | q824c_oth (required) | | --- | --- | --- | --- | --- | | q824c_oth:: Others public sector (specify)  Question relevant when: selected( ${q823} , -94) |
| |  |  |  |  | q825 (required) | | --- | --- | --- | --- | --- | | q825:: How many days after the illness began did you first seek advice or treatment for [ros_cal1]?  Question relevant when: ${q822} = 1 |
| |  |  |  |  | q826 (required) | | --- | --- | --- | --- | --- | | q826:: What were the most important reasons for choosing where to seek advice or treatment for [ros_cal1]'s fever?  RECORD ALL MENTIONED<br/><br/>PROBE: Any other reasons?  Question relevant when: ${q820} = 1 or ${q822} = 1 |
| |  |  |  |  | q826_oth (required) | | --- | --- | --- | --- | --- | | q826_oth:: Other (specify)  Question relevant when: selected( ${q826} , -94) |
| |  |  |  |  | q827 (required) | | --- | --- | --- | --- | --- | | q827:: At any time during the illness, did [ros_cal1] take any medicines for the illness?  Question relevant when: ${q820} = 1 |
| |  |  |  |  | q828 (required) | | --- | --- | --- | --- | --- | | q828:: What medicines did [ros_cal1] take?  Any other medicines?<br/> <br/> RECORD ALL MENTIONED  Question relevant when: ${q827} = 1 |
| |  |  |  |  | q828a_oth (required) | | --- | --- | --- | --- | --- | | q828a_oth:: Other (specify)  Question relevant when: selected( ${q828} , -96) |
| |  |  |  |  | q828b_oth (required) | | --- | --- | --- | --- | --- | | q828b_oth:: Other antimalarial (specify)  Question relevant when: selected( ${q828} , -95) |
| |  |  |  |  | q829 (required) | | --- | --- | --- | --- | --- | | q829:: How long after the fever started did [ros_cal1] first take ACT?  Question relevant when: ${q828} = 1 |
| |  |  |  |  | q830 (required) | | --- | --- | --- | --- | --- | | q830:: Did [ros_cal1] finish the complete ACT dose?  Question relevant when: ${q828} = 1 |
| |  |  |  |  | q831 (required) | | --- | --- | --- | --- | --- | | q831:: Please tell me why did you not seek advice or treatment for the fever for [ros_cal1]?  RECORD ALL MENTIONED<br/><br/>PROBE: Anything other reason?  Question relevant when: ${q827} = 0 |
| |  |  |  |  | q831_oth (required) | | --- | --- | --- | --- | --- | | q831_oth:: Other (specify)  Question relevant when: selected( ${q831} , -96) |
| |  |  |  |  | sec9_nt | | --- | --- | --- | --- | --- | | ACUTE RESPIRATORY INFECTION/COUGH WITH RAPID OR DIFFICULT BREATHING |
| |  |  |  |  | q901 (required) | | --- | --- | --- | --- | --- | | q901:: What are the signs or symptoms of pneumonia?  PROBE: Any other symptoms?<br/> RECORD ALL MENTIONED |
| |  |  |  |  | q901_oth (required) | | --- | --- | --- | --- | --- | | q901_oth:: Other (specify)  Question relevant when: selected( ${q901} , -96) |
| |  |  |  |  | q902 (required) | | --- | --- | --- | --- | --- | | q902:: What are some things that people can do to stop their child(ren) from getting pneumonia?  RECORD ALL MENTIONED<br/> PROBE: Anything else? |
| |  |  |  |  | q903 (required) | | --- | --- | --- | --- | --- | | q903:: What medicines are effective in treating a child with pneumonia?  Pneumonia is a respiratory infection with symptoms of cough and rapid or difficult breathing.<br/><br/>PROBE: Anything else? <br/>RECORD ALL MENTIONED<br/> <br/>BEFORE SELECTING ACT, CHECK RESPONSE WITH THE LIST OF LOCAL BRAND NAMES GIVEN TO YOU. |
| |  |  |  |  | q903a_oth (required) | | --- | --- | --- | --- | --- | | q903a_oth:: Other (specify)  Question relevant when: selected( ${q903} , -96) |
| |  |  |  |  | q903b_oth (required) | | --- | --- | --- | --- | --- | | q903b_oth:: Other antibiotic (specify)  Question relevant when: selected( ${q903} , -95) |
| |  |  |  |  | note9a | | --- | --- | --- | --- | --- | | Now I’m going to read a series of statements about pneumonia. Please tell me if you strongly agree, somewhat agree, somewhat disagree or strongly disagree. |
| |  |  |  |  | q904 | | --- | --- | --- | --- | --- | | q904:: Young children can get severely ill from pneumonia, they could be hospitalized or even die. Pneumonia is a respiratory infection with cough and fast or difficult breathing symptoms (Strongly agree, somewhat agree, somewhat disagree, strongly disagree) |
| |  |  |  |  | q905 | | --- | --- | --- | --- | --- | | q905:: Only weak children die from pneumonia. Pneumonia is a respiratory infection with cough with fast or difficult breathing symptoms (Strongly agree, somewhat agree, somewhat disagree, strongly disagree) |
| |  |  |  |  | q906 | | --- | --- | --- | --- | --- | | q906:: Most women in this community would go to a drug shop or traditional provider for a child with cough and fast or difficult breathing symptoms before visiting a health facility. (Strongly agree, somewhat agree, somewhat disagree, strongly disagree) |
| |  |  |  |  | q907 | | --- | --- | --- | --- | --- | | q907:: Antibiotics are the most effective treatment for pneumonia. Pneumonia is a respiratory infection with cough with fast or difficult breathing symptoms (Strongly agree, somewhat agree, somewhat disagree, strongly disagree) |
| |  |  |  |  | q908 | | --- | --- | --- | --- | --- | | q908:: How likely is it that your child would complete the full course of antibiotics to treat their pneumonia? Would you say very likely, somewhat likely, somewhat unlikely or very unlikely? |
| |  |  |  |  | q909 | | --- | --- | --- | --- | --- | | q909:: How likely is it that you would seek care the same day or next day if your child developed a cough with fast or difficult breathing symptoms? Would you say very likely, somewhat likely, somewhat unlikely, very unlikely |
| |  |  |  |  | q910 | | --- | --- | --- | --- | --- | | q910: How confident are you that you could convince your husband/partner to let you seek care or advice for your child with cough and fast or difficult breathing symptoms? Would you say very confident, somewhat confident, somewhat uncertain or very uncertain. |
| |  |  |  |  | diarrhea9_grp | | --- | --- | --- | --- | --- | | DIARRHEA |
| |  |  |  |  | q911 (required) | | --- | --- | --- | --- | --- | | q911:: What are the things that people can do to stop their child(ren) from getting diarrhea?  MULTIPLE RESPONSES POSSIBLE<br/> RECORD ALL MENTIONED<br/> PROBE ONCE: Anything else? |
| |  |  |  |  | q911_oth (required) | | --- | --- | --- | --- | --- | | q911_oth:: Other (specify)  Question relevant when: selected( ${q911} , -96) |
| |  |  |  |  | q912 (required) | | --- | --- | --- | --- | --- | | q912:: What medicines are effective in treating a child with diarrhoea?  PROBE: Anything else?<br/> RECORD ALL MENTIONED<br/> <br/> BEFORE SELECTING ACT, CHECK RESPONSE WITH THE LIST OF LOCAL BRAND NAMES GIVEN TO YOU. |
| |  |  |  |  | q912a_oth (required) | | --- | --- | --- | --- | --- | | q912a_oth:: Other (specify)  Question relevant when: selected( ${q912} , -96) |
| |  |  |  |  | q912b_oth (required) | | --- | --- | --- | --- | --- | | q912b_oth:: Other fluids (specify)  Question relevant when: selected( ${q912} , -95) |
| |  |  |  |  | q913 (required) | | --- | --- | --- | --- | --- | | q913:: In your opinion, how does ORS help a child with diarrhea?  RECORD ALL MENTIONED<br/>PROBE: Any othe reason? |
| |  |  |  |  | q913_oth (required) | | --- | --- | --- | --- | --- | | q913_oth:: Other (specify)  Question relevant when: selected( ${q913} , -96) |
| |  |  |  |  | q914 (required) | | --- | --- | --- | --- | --- | | q914:: In your opinion, how does zinc help a child with diarrhea?  RECORD ALL MENTIONED<br/>PROBE: Any other reason? |
| |  |  |  |  | q914_oth (required) | | --- | --- | --- | --- | --- | | q914_oth:: Other (specify)  Question relevant when: selected( ${q914} , -96) |
| |  |  |  |  | agree_note91 | | --- | --- | --- | --- | --- | | Now I am going to read some statements to you about diarrhea. For each statement please tell me if you strongly agree, somewhat agree, somewhat disagree, or strongly disagree. |
| |  |  |  |  | q915 (required) | | --- | --- | --- | --- | --- | | q915:: It is very common for children to get diarrhea in my community. |
| |  |  |  |  | q916 (required) | | --- | --- | --- | --- | --- | | q916:: In young children diarrhea can lead to dehydration and even death. |
| |  |  |  |  | q917 (required) | | --- | --- | --- | --- | --- | | q917:: I know how to prepare ORS |
| |  |  |  |  | q918 (required) | | --- | --- | --- | --- | --- | | q918:: How likely are you to continue breastfeeding, if your child develops diarrhea?  Question relevant when: ${q702} = 1 |
| |  |  |  |  | q919 (required) | | --- | --- | --- | --- | --- | | q919:: How likely are to you to give your child ORS if your child develops diarrhea? |
| |  |  |  |  | q920 (required) | | --- | --- | --- | --- | --- | | q920:: How likely are you to give your child zinc the next time he/she develops diarrhea? |
| |  |  |  |  | fever9_grp | | --- | --- | --- | --- | --- | | FEVER |
| |  |  |  |  | q921 (required) | | --- | --- | --- | --- | --- | | q921:: What do you think causes malaria?  RECORD ALL RESPONSES<br/> <br/> PROBE ONCE: Anything else? |
| |  |  |  |  | q921_oth (required) | | --- | --- | --- | --- | --- | | q921_oth:: Other (specify)  Question relevant when: selected( ${q921} , -96) |
| |  |  |  |  | q922 (required) | | --- | --- | --- | --- | --- | | q922:: What are the things that people can do to stop them from getting malaria?  PROBE: Anything else?<br/> RECORD ALL MENTIONED |
| |  |  |  |  | q922_oth (required) | | --- | --- | --- | --- | --- | | q922_oth:: Other (specify)  Question relevant when: selected( ${q922} , -96) |
| |  |  |  |  | note_agreef | | --- | --- | --- | --- | --- | | Please tell me if you strongly agree, somewhat agree, etc. |
| |  |  |  |  | q923 (required) | | --- | --- | --- | --- | --- | | q923:: When a child develops a fever, it is almost/always caused by malaria. |
| |  |  |  |  | q924 (required) | | --- | --- | --- | --- | --- | | q924:: A blood test for malaria is the only way to know if someone really has malaria or not. |
| |  |  |  |  | q925 (required) | | --- | --- | --- | --- | --- | | q925:: Even if the malaria test is negative, I always worry that it may still be malaria. |
| |  |  |  |  | q926 (required) | | --- | --- | --- | --- | --- | | q926:: Children under five years old should sleep under a mosquito net every night of the year. |
| |  |  |  |  | q927 (required) | | --- | --- | --- | --- | --- | | q927:: Pregnant women should sleep under a mosquito net every night of the year. |
| |  |  |  |  | q928 (required) | | --- | --- | --- | --- | --- | | q928:: When a pregnant woman gets malaria, the effect on her and her unborn child is very serious. |
| |  |  |  |  | q929 (required) | | --- | --- | --- | --- | --- | | q929:: The medicine given to pregnant women to prevent malaria works well to keep the mother and baby healthy. |
| |  |  |  |  | q930 (required) | | --- | --- | --- | --- | --- | | q930:: How likely are you to seek advice or treatment for you child the same day or next day if your child were to develop a fever?   Would you say very likely, somewhat likely, somewhat unlikely or very unlikely? |
| |  |  |  |  | q931 (required) | | --- | --- | --- | --- | --- | | q931:: How likely are you to get all of your children under the age of five years to sleep under a mosquito net every night of the year? |
| |  |  |  |  | q932 (required) | | --- | --- | --- | --- | --- | | q932:: How likely are to you to make sure that your children take their entire course of malaria medicine? |
| |  |  |  |  | general9_grp | | --- | --- | --- | --- | --- | | CHILD HEALTH |
| |  |  |  |  | q933 (required) | | --- | --- | --- | --- | --- | | q934:: A health provider is always the best person to talk to when child is sick. |
| |  |  |  |  | q934 (required) | | --- | --- | --- | --- | --- | | q935:: Health facilities in my community frequently have the treatments that are needed to treat sick child. |
| |  |  |  |  | q935 (required) | | --- | --- | --- | --- | --- | | q935:: Besides yourself, who else may influence your decision about whether to seek care for a sick child or not?  Would you say very confident, somewhat confident, somewhat uncertain, or very uncertain?  RECORD ALL MENTIONED<br/>PROBE: Anyone else? |
| |  |  |  |  | q935a_oth (required) | | --- | --- | --- | --- | --- | | q935a_oth:: Other (specify)  Question relevant when: selected( ${q935} , -96) |
| |  |  |  |  | q935b_oth (required) | | --- | --- | --- | --- | --- | | q935b_oth:: Other own family (specify)  Question relevant when: selected( ${q935} , -95) |
| |  |  |  |  | q935c_oth (required) | | --- | --- | --- | --- | --- | | q935c_oth:: Other partner's family (specify)  Question relevant when: selected( ${q935} , -94) |
| |  |  |  |  | q936 (required) | | --- | --- | --- | --- | --- | | q936:: How confident are you that you could convince your husband/partner to let you seek advice or treatment for a sick child? |
| |  |  |  |  | note10_grp | | --- | --- | --- | --- | --- | | Now I would like to ask you about [ros_cal1]'s immunizations. |
| |  |  |  |  | q1001 (required) | | --- | --- | --- | --- | --- | | q1002:: Has [ros_cal1] ever received any immunizations? |
| |  |  |  |  |  | q1002 (required) | | --- | --- | --- | --- | --- | --- | | q1003:: How many times have you taken [ros_cal1] for routine immunization since he/she was born? |
| |  |  |  |  |  | q1003 (required) | | --- | --- | --- | --- | --- | --- | | q1004:: Do you have a card or other document where [ros_cal1]’s vaccinations are written down? |
| |  |  |  |  |  | q1004 (required) | | --- | --- | --- | --- | --- | --- | | q1005:: Did you ever have a vaccination card for [ros_cal1]?  Question relevant when: ${q1003} = 2 or ${q1003} = 4 |
| |  |  |  |  |  | q1005 (required) | | --- | --- | --- | --- | --- | --- | | q1007:: May I see the card or other document where [ros_cal1]'s vaccinations are written down?  Question relevant when: ${q1003} = 1 or ${q1003} = 3 or ${q1004} = 1 |
| |  |  |  |  |  |  | q1006 (required) | | --- | --- | --- | --- | --- | --- | --- | | q1008:: Kindly select all the vaccines recorded on the document |
| |  |  |  |  |  |  | q1006a (required) | | --- | --- | --- | --- | --- | --- | --- | | q1006a:: BCG  Question relevant when: selected( ${q1006} , 1) |
| |  |  |  |  |  |  | q1006b (required) | | --- | --- | --- | --- | --- | --- | --- | | q1006b:: Hepatitis B at birth  Question relevant when: selected( ${q1006} , 2) |
| |  |  |  |  |  |  | q1006c (required) | | --- | --- | --- | --- | --- | --- | --- | | q1006c:: OPV at birth  Question relevant when: selected( ${q1006} , 3) |
| |  |  |  |  |  |  | q1006d (required) | | --- | --- | --- | --- | --- | --- | --- | | q1006d:: OPV 1  Question relevant when: selected( ${q1006} , 4) |
| |  |  |  |  |  |  | q1006e (required) | | --- | --- | --- | --- | --- | --- | --- | | q1006e:: OPV 2  Question relevant when: selected( ${q1006} , 5) |
| |  |  |  |  |  |  | q1006f (required) | | --- | --- | --- | --- | --- | --- | --- | | q1006f:: OPV 3  Question relevant when: selected( ${q1006} , 6) |
| |  |  |  |  |  |  | q1006g (required) | | --- | --- | --- | --- | --- | --- | --- | | q1006g:: DPT 1  Question relevant when: selected( ${q1006} , 7) |
| |  |  |  |  |  |  | q1006h (required) | | --- | --- | --- | --- | --- | --- | --- | | q1006h:: DPT 2  Question relevant when: selected( ${q1006} , 8) |
| |  |  |  |  |  |  | q1006i (required) | | --- | --- | --- | --- | --- | --- | --- | | q1006i:: DPT 3  Question relevant when: selected( ${q1006} , 9) |
| |  |  |  |  |  |  | q1006j (required) | | --- | --- | --- | --- | --- | --- | --- | | q1006j:: PCV1  Question relevant when: selected( ${q1006} , 10) |
| |  |  |  |  |  |  | q1006k (required) | | --- | --- | --- | --- | --- | --- | --- | | q1006k:: PCV2  Question relevant when: selected( ${q1006} , 11) |
| |  |  |  |  |  |  | q1006l (required) | | --- | --- | --- | --- | --- | --- | --- | | q1006l:: PCV3  Question relevant when: selected( ${q1006} , 12) |
| |  |  |  |  |  |  | q1006m (required) | | --- | --- | --- | --- | --- | --- | --- | | q1006m:: Rotavirus 1  Question relevant when: selected( ${q1006} , 13) |
| |  |  |  |  |  |  | q1006n (required) | | --- | --- | --- | --- | --- | --- | --- | | q1006n:: Rotavirus 2  Question relevant when: selected( ${q1006} , 14) |
| |  |  |  |  |  |  | q1006o (required) | | --- | --- | --- | --- | --- | --- | --- | | q1006o:: Rotavirus 3  Question relevant when: selected( ${q1006} , 15) |
| |  |  |  |  |  |  | q1006p (required) | | --- | --- | --- | --- | --- | --- | --- | | q1006p:: Measles vaccine 1  Question relevant when: selected( ${q1006} , 16) |
| |  |  |  |  |  |  | q1006q (required) | | --- | --- | --- | --- | --- | --- | --- | | q1006q:: Measles vaccine 2  Question relevant when: selected( ${q1006} , 17) |
| |  |  |  |  |  |  | q1006r (required) | | --- | --- | --- | --- | --- | --- | --- | | q1006r:: Vit A (most recent)  Question relevant when: selected( ${q1006} , 18) |
| |  |  |  |  |  | q1007 (required) | | --- | --- | --- | --- | --- | --- | | q1007:: In addition to what is recorded on (this document/these documents), did [ros_cal1] receive any other vaccinations, including vaccinations received in campaigns or immunization days or child health days?  Question relevant when: ${q1003} = 1 or ${q1003} = 3 or ${q1004} = 1 |
| |  |  |  |  |  | q1007b (required) | | --- | --- | --- | --- | --- | --- | | q1007b:: if yes, what vaccine is it?  Question relevant when: ${q1007} = 1 |
| |  |  |  |  |  | q1008 (required) | | --- | --- | --- | --- | --- | --- | | q1008:: Did [ros_cal1] ever receive any vaccinations to prevent [ros_cal1] from getting diseases, including vaccinations received in campaigns or immunization days or child health days? |
| |  |  |  |  |  | q1009 (required) | | --- | --- | --- | --- | --- | --- | | q1009:: Has [ros_cal1] ever received a BCG vaccination against  tuberculosis, that is, an injection in the arm or shoulder that usually causes a scar? |
| |  |  |  |  |  | q1010 (required) | | --- | --- | --- | --- | --- | --- | | q1010:: Within 24 hours after birth, did [ros_cal1] receive a  Hepatitis B vaccination, that is, an injection in the thigh  to prevent Hepatitis B? |
| |  |  |  |  |  | q1011 (required) | | --- | --- | --- | --- | --- | --- | | q1011:: Has [ros_cal1] ever received oral polio vaccine, that is,  about two drops in the mouth to prevent polio? |
| |  |  |  |  |  | q1012 (required) | | --- | --- | --- | --- | --- | --- | | q1012:: Did [ros_cal1] receive the first oral polio vaccine in the  first two weeks after birth or later?  Question relevant when: ${q1011} = 1 |
| |  |  |  |  |  | q1013 (required) | | --- | --- | --- | --- | --- | --- | | q1013:: How many times did [ros_cal1] receive the oral polio  vaccine?  Question relevant when: ${q1011} = 1 |
| |  |  |  |  |  | q1014 (required) | | --- | --- | --- | --- | --- | --- | | q1014:: Has [ros_cal1] ever received a pentavalent vaccination,  that is, an injection given in the thigh sometimes at the  same time as polio drops? |
| |  |  |  |  |  | q1015 (required) | | --- | --- | --- | --- | --- | --- | | q1015:: How many times did [ros_cal1] receive the pentavalent  vaccine?  Question relevant when: ${q1014} = 1 |
| |  |  |  |  |  | q1016 (required) | | --- | --- | --- | --- | --- | --- | | q1016:: Has [ros_cal1] ever received a pneumococcal  vaccination, that is, an injection in the thigh to prevent pneumonia? |
| |  |  |  |  |  | q1017 (required) | | --- | --- | --- | --- | --- | --- | | q1017:: How many times did [ros_cal1] receive the  pneumococcal vaccine?  Question relevant when: ${q1016} = 1 |
| |  |  |  |  |  | q1018 (required) | | --- | --- | --- | --- | --- | --- | | q1018:: Has [ros_cal1] ever received a rotavirus vaccination, that is, liquid in the mouth to prevent diarrhea? |
| |  |  |  |  |  | q1019 (required) | | --- | --- | --- | --- | --- | --- | | q1019:: How many times did [ros_cal1] receive the rotavirus  vaccine?  Question relevant when: ${q1018} = 1 |
| |  |  |  |  |  | q1020 (required) | | --- | --- | --- | --- | --- | --- | | q1020:: Has [ros_cal1] ever received a measles vaccination, that is, an injection in the arm to prevent measles? |
| |  |  |  |  |  | q1021 (required) | | --- | --- | --- | --- | --- | --- | | q1021:: How many times did [ros_cal1] receive the measles  vaccine?  Question relevant when: ${q1020} = 1 |
| |  |  |  |  | q1022a (required) | | --- | --- | --- | --- | --- | | q1022a:: In the last 7 days was [ros_cal1] given Micronutrient supplement (Sinadaran gina jiki)? |
| |  |  |  |  | q1022b (required) | | --- | --- | --- | --- | --- | | q1022b:: In the last 7 days was [ros_cal1] given Therapeutic food (Sinadaran abinci na gina jiki na ruwa)? |
| |  |  |  |  | q1022c (required) | | --- | --- | --- | --- | --- | | q1022c:: In the last 7 days was [ros_cal1] given Supplemental food (Sinadaran abinci na kara kuzari)? |
| |  |  |  |  | q1023 (required) | | --- | --- | --- | --- | --- | | q1028:: How many times should a child be taken to a health  facility/post for his routine immunization before 12 months?  Record -98 for Don’t know / Don’t remember |
| |  |  |  |  | q1024 (required) | | --- | --- | --- | --- | --- | | q1029:: Please tell me, at what age or time in a child’s life should he/her be taken to the health facility for his/her FIRST routine immunization visit? |
| |  |  |  |  | q1024_oth (required) | | --- | --- | --- | --- | --- | | q1024_oth:: Other (specify)  Question relevant when: ${q1024} = -96 |
| |  |  |  |  | q1025 (required) | | --- | --- | --- | --- | --- | | q1025:: Please tell me some reasons why a mother in this community may not get her child vaccinated.  "RECORD ALL RESPONSES<br/> <br/> PROBE ONCE: Anything else?"  Question relevant when: ${q1001} != 1 |
| |  |  |  |  | q1026 (required) | | --- | --- | --- | --- | --- | | q1026:: In your opinion, how effective are childhood vaccines? That is, how powerful are they in preventing the diseases that they are supposed to prevent? Would you say very effective, somewhat effective or not at all effective? |
| |  |  |  |  | q1027 (required) | | --- | --- | --- | --- | --- | | q1027:: If you had another infant today, how likely is it that you would make sure he/she received all of his/her recommended vaccines. Would you say very likely, somewhat likely, somewhat unlikely or very unlikely? |
| |  |  |  |  | note1033 | | --- | --- | --- | --- | --- | | Now I am going to read some statements to you about child vaccination. For each statement please tell me if you strongly agree, somewhat agree, somewhat disagree, or strongly disagree. |
| |  |  |  |  | q1028 (required) | | --- | --- | --- | --- | --- | | q1028:: Many of the illnesses vaccines prevent are severe, that is to say those illnesses can cause a child to get sick or even die. |
| |  |  |  |  | q1029 (required) | | --- | --- | --- | --- | --- | | q1029:: I know where and when to get a child vaccinated. |
| |  |  |  |  | q1030 (required) | | --- | --- | --- | --- | --- | | q1030:: It is very easy for mothers in this community to take a child for routine immunization at a health facility |
| |  |  |  |  | q1031 (required) | | --- | --- | --- | --- | --- | | q1031:: It is very easy for mothers in this community to keep track of a child’s routine immunizations. |
| |  |  |  |  | q1032 (required) | | --- | --- | --- | --- | --- | | q1032:: Immunization services in my community are free. |
| |  |  |  |  | q1033 (required) | | --- | --- | --- | --- | --- | | q1033:: Most people in my community trust healthcare workers who provide immunization services. |
| |  |  |  |  | q1034 (required) | | --- | --- | --- | --- | --- | | q1034:: Health facilities in my community frequently have the vaccine you need and when you need it. |
| |  |  |  |  | q1035 (required) | | --- | --- | --- | --- | --- | | q1035:: Besides yourself, who else may influence your decision to get a child vaccinated?  RECORD ALL MENTIONED<br/> <br/>PROBE: Anyone else? |
| |  |  |  |  | q1036 (required) | | --- | --- | --- | --- | --- | | q1036:: Most parents in my community take their children to the health facility/clinic for routine immunization.   Would you strongly agree, somewhat agree, somewhat disagree or strongly disagree with this statement? |
| |  |  |  |  | q1037 (required) | | --- | --- | --- | --- | --- | | q1037:: Vaccines have chemicals that can be dangerous to a child’s health.   Would you strongly agree, somewhat agree, somewhat disagree or strongly disagree with this statement? |
| |  |  |  | q1100 | | --- | --- | --- | --- | | q1100: Are you current married? |
| |  |  |  |  | sec11_note | | --- | --- | --- | --- | --- | | SECTION 11: GENDER  Now I would like to ask you some questions regarding your partner and how you and your partner make household decisions. Please remember to be as honest as possible and that your responses will remain confidential; that is, no one will see your answers. |
| |  |  |  |  | q1101 (required) | | --- | --- | --- | --- | --- | | q1101:: How old was your partner on his last birthday?  Enter -98 if "Don't know" |
| |  |  |  |  | q1102 (required) | | --- | --- | --- | --- | --- | | q1102:: Did your husband/partner ever attend school? |
| |  |  |  |  | q1103 (required) | | --- | --- | --- | --- | --- | | q1103:: What was the highest level of school he attended: primary, secondary, or higher?  Question relevant when: ${q1102} = 1 |
| |  |  |  |  | q1104 (required) | | --- | --- | --- | --- | --- | | q1107:: What is your husband/partner’s occupation; that is, what kind of work does he mainly do when he is working? |
| |  |  |  |  | q1104_oth (required) | | --- | --- | --- | --- | --- | | q1104_oth:: Partner's Occupation Others  Question relevant when: ${q1104} = -96 |
| |  |  |  |  | q1105 (required) | | --- | --- | --- | --- | --- | | q1105:: Does your husband/partner usually work throughout the year, seasonally, or only once in a while?  Question relevant when: ${q1104} >2 or ${q1104} = -96 |
| |  |  |  |  | q1106 (required) | | --- | --- | --- | --- | --- | | q1106:: What is your main occupation? That is, what kind of work do you mainly do? |
| |  |  |  |  | q1107 (required) | | --- | --- | --- | --- | --- | | q1107:: Do you usually work throughout the year, or do you work seasonally, or only once in a while?  Question relevant when: ${q1106} >2 or ${q1106} = -96 |
| |  |  |  |  | q1108 (required) | | --- | --- | --- | --- | --- | | q1108:: Does your husband/partner have other wives or does he live with other women as if married? |
| |  |  |  |  | q1109 (required) | | --- | --- | --- | --- | --- | | q1109:: Altogether, how many wives or live-in partners does he have?  Question relevant when: ${q1108} =1 |
| |  |  |  |  | q1110 (required) | | --- | --- | --- | --- | --- | | q1110:: Do you regularly attend any groups/meetings in your community?  If YES, probe to find out type of group/meeting.<br/>RECORD ALL MENTIONED |
| |  |  |  |  | q1110_oth (required) | | --- | --- | --- | --- | --- | | q1110_oth:: Yes, other (specify)  Question relevant when: selected( ${q1110} , -96) |
| |  |  |  |  | q1111 (required) | | --- | --- | --- | --- | --- | | q1111: In the past six months, have you participated in any event or meeting in this community where a community health volunteer discussed child birth spacing and family planning?  Question relevant when: ${q1110} >2 or ${q1110} = -96 |
| |  |  |  |  | q1112 (required) | | --- | --- | --- | --- | --- | | q1112: What kind of event was this?  Question relevant when: ${q1111} =1 |
| |  |  |  |  |  | q1113 (required) | | --- | --- | --- | --- | --- | --- | | q1113: At this event did the community volunteer wear a hijab or vest with a special marking or logo on it? |
| |  |  |  |  |  | q1113_img | | --- | --- | --- | --- | --- | --- | | - |
| |  |  |  |  | q1114 (required) | | --- | --- | --- | --- | --- | | q1114: What was the special marking or logo?  Question relevant when: ${q1113} =1 |
| |  |  |  |  | q1114_oth (required) | | --- | --- | --- | --- | --- | | q1114_oth: Other logo or special marking specify  Question relevant when: ${q1114} = -96 |
| |  |  |  |  | q1115 (required) | | --- | --- | --- | --- | --- | | q1115: What were the main messages dicussed during this event?  Question relevant when: ${q1111} =1 |
| |  |  |  |  | q1116 (required) | | --- | --- | --- | --- | --- | | q1116: In the last six months did a community health volunteer visit you in your home to talk about child birth spacing and family planning? |
| |  |  |  |  | q1117 (required) | | --- | --- | --- | --- | --- | | q1117: At this household visit, did the community volunteer wear a hijab or vest with a special marking or logo on it?  Question relevant when: ${q1116} =1 |
| |  |  |  |  | q1118 (required) | | --- | --- | --- | --- | --- | | q1118: What was the special marking or logo?  Question relevant when: ${q1117} =1 |
| |  |  |  |  | q1118_oth (required) | | --- | --- | --- | --- | --- | | q1118_oth: Other logo or special marking specify  Question relevant when: ${q1118} = -96 |
| |  |  |  |  | q1119 (required) | | --- | --- | --- | --- | --- | | q1119: What were the main messages discussed during this event?  Question relevant when: ${q1116} =1 |
| |  |  |  |  | q1120 (required) | | --- | --- | --- | --- | --- | | q1120:: Due to your last menstrual period, were there any social activities, school, or work days that you did not attend? |
| |  |  |  |  |  | note1120 | | --- | --- | --- | --- | --- | --- | | Who usually makes the following decisions in your household, you, your husband/partner, or you and your spouse/partner jointly? |
| |  |  |  |  |  | q1121a (required) | | --- | --- | --- | --- | --- | --- | | q1121a. Respondent's money |
| |  |  |  |  |  | q1121b (required) | | --- | --- | --- | --- | --- | --- | | q1121b. Husband's money |
| |  |  |  |  |  | q1121c (required) | | --- | --- | --- | --- | --- | --- | | q1121c. Major purchase |
| |  |  |  |  |  | q1121d (required) | | --- | --- | --- | --- | --- | --- | | q1121d. Schooling |
| |  |  |  |  |  | q1121e (required) | | --- | --- | --- | --- | --- | --- | | q1121e. Work outside home |
| |  |  |  |  | noteee | | --- | --- | --- | --- | --- | | Now I am going to read a series of statements to you and I would like you to tell me if you strongly agree, somewhat agree, somewhat disagree, or strongly disagree with the statement.  Interviewer: Do not read ‘DONT KNOW/UNCERTAIN’ response and only use if respondent is not able to provide another answer. |
| |  |  |  |  | q1122a (required) | | --- | --- | --- | --- | --- | | q1122a: I feel that I am a person of worth, that my life has purpose. |
| |  |  |  |  | q1122b (required) | | --- | --- | --- | --- | --- | | q1122b: I feel that I have a number of good qualities. |
| |  |  |  |  | q1122c (required) | | --- | --- | --- | --- | --- | | q1122c: I feel I have much to be proud of. |
| |  |  |  |  | q1122d (required) | | --- | --- | --- | --- | --- | | q1122d: I am equal to my peers (sisters, friends, neighbours) |
| |  |  |  |  | q1123 (required) | | --- | --- | --- | --- | --- | | q1123 It is important for couples to discuss child health and make decisions together about the health of their child. |
| |  |  |  |  | q1124 (required) | | --- | --- | --- | --- | --- | | q1124. A woman should play a role in making decisions about the household. |
| |  |  |  |  | q1125 (required) | | --- | --- | --- | --- | --- | | q1125. It is more important for boys to get an education than it is for girls. |
| |  |  |  |  | q1126 (required) | | --- | --- | --- | --- | --- | | q1126. A good marriage is more important for a girl than a good education. |
| |  |  |  |  | q1127 (required) | | --- | --- | --- | --- | --- | | q1127. It is a woman’s job mainly to take care of the home and cook for her family. |
| |  |  |  |  | q1201 (required) | | --- | --- | --- | --- | --- | | q1201:: Do you ever watch TV? |
| |  |  |  |  | q1202 (required) | | --- | --- | --- | --- | --- | | q1202:: About how many days in a normal week do you watch TV?  Record -98 if "Don't Know"  Question relevant when: ${q1201} =1 |
| |  |  |  |  | q1203a | | --- | --- | --- | --- | --- | | q1203a:: In the last 12 months, did you see any health advertisements/messages on the television?  Question relevant when: ${q1201} =1 |
| |  |  |  |  | q1203b | | --- | --- | --- | --- | --- | | q1203b:: What were those messages about?  "PROBE: Anything else?<br/> RECORD ALL MENTIONED"  Question relevant when: ${q1203a} =1 |
| |  |  |  |  | q1204 (required) | | --- | --- | --- | --- | --- | | q1204:: Do you ever listen to the radio? |
| |  |  |  |  | q1205 (required) | | --- | --- | --- | --- | --- | | q1205:: How frequently do you listen to the radio? Would you say four or more times a week, two or three times a week, once a week, less than once a week or never?  Question relevant when: ${q1204} =1 |
| |  |  |  |  | q1206a | | --- | --- | --- | --- | --- | | q1206a:: In the last 12 months, did you hear any health advertisements/messages on the radio?  Question relevant when: ${q1204} =1 |
| |  |  |  |  | q1206b | | --- | --- | --- | --- | --- | | q1206b:: What were those messages about?  "PROBE: Anything else?<br/> RECORD ALL MENTIONED"  Question relevant when: ${q1206a} =1 |
| |  |  |  |  | q1207a (required) | | --- | --- | --- | --- | --- | | q1207a:: Have you heard the slogan Albishirin Ku! on the radio?  Question relevant when: ${q1204} =1 |
| |  |  |  |  | q1207b (required) | | --- | --- | --- | --- | --- | | q1207b::Have you heard a radio program featuring the story of a couple named Faruk and Jamila?  Question relevant when: ${q1204} =1 |
| |  |  |  |  | q1207c (required) | | --- | --- | --- | --- | --- | | q1207c::Have you heard a radio drama or jingle in which this was mentioned at the end: "Wannan Sakone Daga Ma'aikatar Lafiya Ta Kasa, Da Ta Jiha, Da Kuma Tallafin Alummar Amurka?  Question relevant when: ${q1204} =1 |
| |  |  |  |  | q1208d (required) | | --- | --- | --- | --- | --- | | q1208d:: Have you heard this song on the radio?  INTERVIEWER: Play the clip of the ALBISHIRIN KU song. |
| |  |  |  |  | q1209 (required) | | --- | --- | --- | --- | --- | | q1209: What were the key messages of the ALBISHIRIN KU! song?  Question relevant when: ${q1204} =1 or ${q1208d} = 1 |
| |  |  |  |  | q1210a (required) | | --- | --- | --- | --- | --- | | q1210a:: Have you heard a radio jingle featuring an auto mechanic and a driver talking about malaria?  Question relevant when: ${q1204} =1 |
| |  |  |  |  | q1211b (required) | | --- | --- | --- | --- | --- | | q1211b:: Have you heard this radio jingle on the radio?  INTERVIEWER: Play the clip of "MY CAR". |
| |  |  |  |  | q1212a (required) | | --- | --- | --- | --- | --- | | q1212a. Have you heard a radio jingle featuring a football coach and his young son talking about malaria?  Question relevant when: ${q1204} =1 |
| |  |  |  |  | q1212b (required) | | --- | --- | --- | --- | --- | | q1212b. Have you heard this song on the radio?  INTERVIEWER: Play the clip of "THE CHAMPION".  Question relevant when: ${q1204} =1 |
| |  |  |  |  | q1213a (required) | | --- | --- | --- | --- | --- | | q1213a:: Have you heard this radio show: Taka Naka Rawan  Question relevant when: ${q1204} =1 |
| |  |  |  |  | q1213b (required) | | --- | --- | --- | --- | --- | | q1213b:: Have you heard this radio show: Don Tuwon Gobe  Question relevant when: ${q1204} =1 |
| |  |  |  |  | q1213c (required) | | --- | --- | --- | --- | --- | | q1213c:: Have you heard this radio show: Kai da lafiya  Question relevant when: ${q1204} =1 |
| |  |  |  |  | q1213d (required) | | --- | --- | --- | --- | --- | | q1213d:: Have you heard this radio show: Lafiyar mata da kananan yara  Question relevant when: ${q1204} =1 |
| |  |  |  |  | q1213e (required) | | --- | --- | --- | --- | --- | | q1213e:: Have you heard this radio show: Lafiyar Uwar Komai  Question relevant when: ${q1204} =1 |
| |  |  |  |  | q1214 (required) | | --- | --- | --- | --- | --- | | q1214:: Do you ever read the newpaper or magazines? |
| |  |  |  |  | q1215 (required) | | --- | --- | --- | --- | --- | | q1215:: How frequently do you read the newspaper or magazines? Would you say four or more times a week, two or three times a week, once a week, less than once a week or never?  Question relevant when: ${q1214} =1 |
| |  |  |  |  | q1216a (required) | | --- | --- | --- | --- | --- | | q1216a:: In the last 12 months, did you read any health advertisements or messages in the newspaper or any magazine?  Question relevant when: ${q1214} =1 |
| |  |  |  |  | q1216b (required) | | --- | --- | --- | --- | --- | | q1216b:: What were those messages about?  "PROBE: Anything else?<br/> RECORD ALL MENTIONED"  Question relevant when: ${q1216a} =1 |
| |  |  |  |  | q1218 (required) | | --- | --- | --- | --- | --- | | q1218:: Have you ever used the internet? |
| |  |  |  |  | q1219 (required) | | --- | --- | --- | --- | --- | | q1219:: About how many days in a normal week do you use the internet?  Question relevant when: ${q1218} =1 |
| |  |  |  |  | q1220 (required) | | --- | --- | --- | --- | --- | | q1220:: How do you access the internet?  Question relevant when: ${q1218} =1 |
| |  |  |  |  | q1221 (required) | | --- | --- | --- | --- | --- | | q1221:: How easy or difficult is it for you access the internet to look up health information?  Question relevant when: ${q1218} =1 |
| |  |  |  |  | q1222a (required) | | --- | --- | --- | --- | --- | | q1222a:: In the last 12 months, did you read any health advertisements or messages on the internet?  Question relevant when: ${q1218} =1 |
| |  |  |  |  | q1222b (required) | | --- | --- | --- | --- | --- | | q1222b:: What were those messages about?  "PROBE: Anything else?<br/> RECORD ALL MENTIONED"  Question relevant when: ${q1222a} =1 |
| |  |  |  |  |  | q1223nt | | --- | --- | --- | --- | --- | --- | | On which of the following sites did you see this information: |
| |  |  |  |  |  | q1223_label | | --- | --- | --- | --- | --- | --- | | - |
| |  |  |  |  |  | q1223a (required) | | --- | --- | --- | --- | --- | --- | | a. Google |
| |  |  |  |  |  | q1223b (required) | | --- | --- | --- | --- | --- | --- | | b. Facebook |
| |  |  |  |  |  | q1223c (required) | | --- | --- | --- | --- | --- | --- | | c. Instagram |
| |  |  |  |  |  | q1223d (required) | | --- | --- | --- | --- | --- | --- | | d. Twitter |
| |  |  |  |  |  | q1223e (required) | | --- | --- | --- | --- | --- | --- | | e. A health website |
| |  |  |  |  |  | q1223f (required) | | --- | --- | --- | --- | --- | --- | | f. Any other site |
| |  |  |  |  | q1224 (required) | | --- | --- | --- | --- | --- | | q1224:: In the last 12 months have you received, heard or seen any health information from sources other than the television, radio, newspaper/magazines, and internet? |
| |  |  |  |  | q1225 (required) | | --- | --- | --- | --- | --- | | q1225:: From which other sources or persons did you receive the health information in the past 3 months?  Question relevant when: ${q1224} =1 |
| |  |  |  |  | q1226a_oth (required) | | --- | --- | --- | --- | --- | | q1226a_oth:: Other Public Source (Specify)  Question relevant when: selected( ${q1225} , -94) |
| |  |  |  |  | q1226b_oth (required) | | --- | --- | --- | --- | --- | | q1226b_oth:: Other Relatives (Specify)  Question relevant when: selected( ${q1225} , -95) |
| |  |  |  | q1301 (required) | | --- | --- | --- | --- | | q1301:: Do you own a mobile phone? |
| |  |  |  | q1301b (required) | | --- | --- | --- | --- | | q1301b:: Is it a basic mobile phone or smart phone?  Question relevant when: ${q1301} = 1 |
| |  |  |  |  | q1302 (required) | | --- | --- | --- | --- | --- | | q1302:: Can you please provide me with your GSM number(s) through which we can reach you later? |
| |  |  |  |  | q1302a (required) | | --- | --- | --- | --- | --- | | 1302a: First phone number  Question relevant when: ${q1302} = 1 |
| |  |  |  |  | q1302a_con (required) | | --- | --- | --- | --- | --- | | 1302a: First phone number confirmation  Question relevant when: ${q1302} = 1 |
| |  |  |  |  | q1302b (required) | | --- | --- | --- | --- | --- | | 1302b: Second phone number  Enter -99 for no second phone  Question relevant when: string-length( ${q1302a} ) = 11 |
| |  |  |  |  | q1302b_con (required) | | --- | --- | --- | --- | --- | | 1302b: Second phone number confirmation  Enter -99 for no second phone  Question relevant when: string-length( ${q1302b} ) = 11 |
| |  |  |  | end_note | | --- | --- | --- | --- | | Thank the respondent for her time. |
| gps | Take a GPS point near the ENTRANCE to the household. Record location when the accuracy is smaller than 6m.  GPS coordinates can only be collected when outside. |
| list_result (required) | Record the result |
| list_result_oth (required) | Other (specify)  Question relevant when: ${list_result} = '-96' |
| next_visit (required) | Next visit date  Question relevant when: ${list_result} = 3 |
| observation (required) | Please enter your observations |
